# Supplementary material for: DNA mini-barcoding reveals the mislabeling rate of canned cat food in Taiwan
Source: PeerJ journal article supplement (doi:10.7717/peerj.16833), 2024-02-21
Supplement: SI1.pdf [file SI1.pdf]

Photos of all sampled canned cat food products and their codes in this study.

|                                                                                     |                                                                                     |                                                                                      |                                                                                       |
|-------------------------------------------------------------------------------------|-------------------------------------------------------------------------------------|--------------------------------------------------------------------------------------|---------------------------------------------------------------------------------------|
| B1A                                                                                 | B1B                                                                                 | B1C                                                                                  | B1D                                                                                   |
|    |    |    |    |
| B2A                                                                                 | B2B                                                                                 | B2C                                                                                  | B2F                                                                                   |
|    |    |    |    |
| B2G                                                                                 | B2H                                                                                 | B3A                                                                                  | B3B                                                                                   |
|   |   |   |   |
| B3C                                                                                 | B3D                                                                                 | B3E                                                                                  | B3F                                                                                   |
|  |  |  |  |
| B3G                                                                                 | B3H                                                                                 | B3I                                                                                  | B3J                                                                                   |
|  |  |  |  |
| B3K                                                                                 | C1A                                                                                 | C1B                                                                                  | C1C                                                                                   |
|  |  |  |  |
| C1D                                                                                 | C1E                                                                                 | C1F                                                                                  |                                                                                       |
|  |  |  |                                                                                       |

|                                                                                     |                                                                                     |                                                                                      |                                                                                       |
|-------------------------------------------------------------------------------------|-------------------------------------------------------------------------------------|--------------------------------------------------------------------------------------|---------------------------------------------------------------------------------------|
| C2A                                                                                 | C2B                                                                                 | C2C                                                                                  | C2D                                                                                   |
|    |    |    |    |
| C3A                                                                                 | C3B                                                                                 | C3C                                                                                  | C3D                                                                                   |
|    |    |    |    |
| C3E                                                                                 | C4A                                                                                 | C4B                                                                                  | C4C                                                                                   |
|    |    |    |    |
| C4D                                                                                 | C5A                                                                                 | C5B                                                                                  | C5C                                                                                   |
|   |   |   |   |
| C5G                                                                                 | C5H                                                                                 | C5I                                                                                  | C6A                                                                                   |
|  |  |  |  |
| C6B                                                                                 | C6C                                                                                 | C6D                                                                                  | C6E                                                                                   |
|  |  |  |  |
| D3A                                                                                 | D3B                                                                                 | D3C                                                                                  |                                                                                       |
|  |  |  |                                                                                       |



|                                                                                     |                                                                                     |                                                                                      |                                                                                       |
|-------------------------------------------------------------------------------------|-------------------------------------------------------------------------------------|--------------------------------------------------------------------------------------|---------------------------------------------------------------------------------------|
| D1A                                                                                 | D1B                                                                                 | D1C                                                                                  | D1D                                                                                   |
|    |    |    |    |
| D2A                                                                                 | D2B                                                                                 | D2C                                                                                  | D2D                                                                                   |
|    |    |    |    |
| D2E                                                                                 | D2F                                                                                 | D2G                                                                                  | E1A                                                                                   |
|    |    |    |    |
| E1B                                                                                 | E1C                                                                                 | E1D                                                                                  | E1E                                                                                   |
|  |  |  |  |
| E1F                                                                                 | E2A                                                                                 | E2B                                                                                  | E2D                                                                                   |
|  |  |  |  |
| E2E                                                                                 | C5F                                                                                 | E3A                                                                                  | E3B                                                                                   |
|  |  |  |  |
| E3C                                                                                 | E3D                                                                                 | E3E                                                                                  | E4A                                                                                   |
|  |  |  |  |

|                                                                                     |                                                                                     |                                                                                      |                                                                                       |
|-------------------------------------------------------------------------------------|-------------------------------------------------------------------------------------|--------------------------------------------------------------------------------------|---------------------------------------------------------------------------------------|
| E4B                                                                                 | E4C                                                                                 | E4D                                                                                  | E4E                                                                                   |
|    |    |    |    |
| F2A                                                                                 | F2B                                                                                 | F2C                                                                                  | F2D                                                                                   |
|    |    |    |    |
| F2E                                                                                 | F2F                                                                                 | F3A                                                                                  | F3C                                                                                   |
|    |    |    |    |
| F3D                                                                                 | F1E                                                                                 | F4A                                                                                  | F4B                                                                                   |
|   |   |   |   |
| F4C                                                                                 | F4D                                                                                 | F5A                                                                                  | F5B                                                                                   |
|  |  |  |  |
| F5C                                                                                 | F5D                                                                                 | F5E                                                                                  | F6A                                                                                   |
|  |  |  |  |
| F6B                                                                                 | G1A                                                                                 | I1A                                                                                  | I1B                                                                                   |
|  |  |  |  |



|                                                                                     |                                                                                     |                                                                                      |                                                                                       |
|-------------------------------------------------------------------------------------|-------------------------------------------------------------------------------------|--------------------------------------------------------------------------------------|---------------------------------------------------------------------------------------|
| I1C                                                                                 | I2A                                                                                 | I2B                                                                                  | I2C                                                                                   |
|    |    |    |    |
| I2D                                                                                 | J1A                                                                                 | J1B                                                                                  | J1C                                                                                   |
|    |    |    |    |
| J1D                                                                                 | J2A                                                                                 | J2B                                                                                  | J2C                                                                                   |
|    |    |    |    |
| I3A                                                                                 | I3B                                                                                 | I3C                                                                                  | I3D                                                                                   |
|  |  |  |  |
| L1A                                                                                 | L1B                                                                                 | L1C                                                                                  | L1D                                                                                   |
|  |  |  |  |
| L2A                                                                                 | L2B                                                                                 | L2C                                                                                  | L2D                                                                                   |
|  |  |  |  |
| L3A                                                                                 | L3B                                                                                 | L3C                                                                                  | E2C                                                                                   |
|  |  |  |  |
