# Supplementary material for: DNA mini-barcoding reveals the mislabeling rate of canned cat food in Taiwan
Source: PeerJ journal article supplement (doi:10.7717/peerj.16833), 2024-02-21
Supplement: SI2.pdf [file SI2.pdf]

>B1A

ATGGAGCTTTAGACACTAAGACAGTATCATGTTAAACACCCCACAAATAACGGCCTAAAC  
CTTAATGACCTCCTGTCCTAATGTCTTCG-----

>B1B

ATGGAGCTTTAGACACCAAGGCATATCATGTTAAACACCCCCTAAATAAAGGACCAAACC  
AAATGAATTATGCCCCCATGTCTTTG-----

>B1C1

ATGGAGCTTTAGACACCAAGGCATATCATGTTAAACACCCCCTAAATAAAGGACCAAACC  
AAATGAATTATGCCCCCATGTCTTTG-----

>B1C2

GTGGAACCTTTAAAATCACGACCACCTTACAACCTTACACAGCCCCACTGGGTCCACCCA  
CACATAAACCCCTGGTCGACATTTTTTCG-----

>B1D1

ATGGAGCTTTAGACACTAAGGCATATCATGTTAAACACCCCCTGAACAAAGGATTAACC  
AAATGAATAATGCCCCCATGTCTTTG-----

>B2A

GTGGAACCTTTAAAATCACGACCACCTTACAACCTTACACAGCCCCACTGGGTCCACCCA  
CACATAAACCCCTGGTCGACATTTTTTCG-----

>B2B1

GTGGAACCTTTAAAATCACGACCACCTTACAACCTTACACAGCCCCACTGGGTCCACCCA  
CACATAAACCCCTGGTCGACATTTTTTCG-----

>B2B2

ATGGAGCTTTAGACACTAAGGCATATCATGTTAAACACCCCCTGAACAAAGGATTAACC  
AAATGAATAATGCCCCCATGTCTTTG-----

>B2F1

ATGGAGCTTTAGACACCAAGGCATATCATGTTAAACACCCCCTAAATAAAGGACCAAACC  
AAATGAATTATGCCCCCATGTCTTTG-----

>B2F2

ATGGAGCTTTAGACACTAGCCAAGTATGAATAAGCGGCCGCATTAAATGGCCCCAAGCA  
CCCGTAGCCTTCTGGTAATGTGTCTTAT-----

>B2G1

ATGGAGCTTTAGACACCAAGGCATATCATGTTAAACACCCCCTAAATAAAGGACCAAACC  
AAATGAATTATGCCCCCATGTCTTTG-----

>B2H1

GTGGAACCTTTAAAATCACGACCACCTTACAACCTTACACAGCCCCACTGGGTCCACCCA  
CACATAAACCCCTGGTCGACATTTTTTC-----

>B2H2

TTCATGGAGCTTTAACTAACCAACCCAAAGAGAATAGATTTAACCATTAAGGAATAACA

ACAATCTCCATGAGTTGGTAGTTTCG-----

>B3A1

ATGGAGCTTTAGACACCAAGGCATATCATGTTAAACACCCCTAAATAAAGGACCAAACC  
AAATGAATTATGCCCCCATGTCTTTG-----

>B3A2

GTGGAACCTTTAAAATCACGACCACCTTACAACCTTACACAGCCCCACTGGGTCCACCCA  
CACATAAACCCCTGGTCGACATTTTTCG-----

>B3B2

ATGGAGCTTTAGACACCAGGCAGATCACGTCAAGTAACCTTGAATTAACAAGTAAAAAC  
GCAGTGACCCCTAGCCCATATGTCTTTG-----

>B3B1

ATGGAGCTTTAGACACCAAGGCATATCATGTTAAACACCCCTAAATAAAGGACCAAACC  
AAATGAATTATGCCCCCATGTCTTTG-----

>B3C1

ATGGAGCTTTAGACACCAAGGCATATCATGTTAAACACCCCTAAATAAAGGACCAAACC  
AAATGAATTATGCCCCCATGTCTTTG-----

>B3C2

GTGGAGCTTTAGACGCTAAGGCAGACCGAGCCAAATTTGCCCGAGGACAATTAGCAAA  
ACTAAATTCGAACCCTGCCCGCATGTCTTTG-----

>B3D1

ATGGAGCTTTAGACACCAAGGCATATCATGTTAAACACCCCTAAATAAAGGACCAAACC  
AAATGAATTATGCCCCCATGTCTTTG-----

>B3D2

ATAAAGCTTTACAATTATTTAATTAAATTATAAATTGTTGGTTTAACTTGATTTAATTAATAT  
TTGTTTC-----

>B3E1

ATGGAGCTTTAGACACCAAGGCATATCATGTTAAACACCCCTAAATAAAGGACCAAACC  
AAATGAATTATGCCCCCATGTCTTTG-----

>B3E2

ATGGAGCTTTAGACACTAGCCAACTGTGAATAAGCGACTGAACTGAGCAAGTCCTAAAT  
ACCCGCAGCCTTATGGTAATGTAGTCTTAG-----

>B3F1

ATGGAGCTTTAGACACTAAGGCATATCATGTTAAACACCCCTGAACAAAGGATTAACC  
AAATGAATAATGCCCCCATGTCTTTG-----

>B3F2

GTGGAGCTTTAGACGCTAAGGCAGACCGAGCCAAATTTGCCCGAGGACAATTAGCAAA  
ACTAAATTCGAACCCTGCCCGCATGTCTTTG-----

>B3G2

ATGGAGCTTTAGACACTAGCCAATCTGTGAATAAGCGACTGAACTGAGCAAGTCCTAAA  
TACCCGCAGCCTTATGGTAATGTAGTCTTAG-----

>B3I1

ATGGAGCTTTAGACACTAAGGCATATCATGTAAACACCCCTGAACAAAGGATTAACC  
AAATGAATAATGCCCCCATGTCTTTG-----

>B3H1

ATGGAGCTTTAGACACTAAGGCATATCATGTAAACACCCCTGAACAAAGGATTAACC  
AAATGAATAATGCCCCCATGTCTTTG-----

>B3J1

ATGGAGCTTTAGACACTAAGGCATATCATGTAAACACCCCTGAACAAAGGATTAACC  
AAATGAATAATGCCCCCATGTCTTTG-----

>B3I2

GTGGAACCTTTAAAATCACGACCACCTTACAACCTTACACAGCCCCACTGGGTCCACCCA  
CACATAAACCCCGTGGTCGACATTTTTTCG-----

>B3J2

ATGGAGCTTTAGACACTAAGGCATATCATGTAAACACCCCTGAACAAAGGATTAACC  
AAATGAATAATGCCCCCATGTCTTTG-----

>B3K1

ATGGAGCTTTAGACACTAAGGCATATCATGTAAACACCCCTGAACAAAGGATTAACC  
AAATGAATAATGCCCCCATGTCTTTG-----

>C1A1

ATGGAGCTTTAGACACCAAGGCATATCATGTAAACACCCCTAAATAAAGGACCAAACC  
AAATGAATATGCCCCCATGTCTTTG-----

>C1B1

ATGGAGCTTTAGACACCAAGGCATATCATGTAAACACCCCTAAATAAAGGACCAAACC  
AAATGAATTATGCCCCCATGTCTTTG-----

>C1D1

ATGGAGCTTTAGACACCAAGGCATATCATGTAAACACCCCAAATAAAGGACCAAACC  
AAATGAATTATGCCCCCATGTCTTTG-----

>C1C2

GTGGAACCTTTAAAATCACGACCACCTTACAACCTTACACAGCCCCACTGGGTCCACCCA  
CACATAAACCCCTGGTCGACATTTTTTCG-----

>C1E1

ATGGAGCTTTAGACACCAAGGCATATCATGTAAACCACCCCTAAATAAAGGACCAAAC  
CAAATGAATTATGCCCCCATGTCTTTG-----

>C1E2

ATGGAGCTTTAGACACCAAGGCATATCATGTAAACACCCCTAAATAAAGGACCAAACC  
AAATGAATTATGCCCCCATGTCTTTG-----

>C1F1

ATGGAGCTTTAGACACCAAGGCATATCATGTTAAACACCCCTAAATAAAGGACCAAACC  
AAATGAATTATGCCCCCATGT~~~~~CTTTG-----

>C2A1

GTGGAACCTTTAAAATCACGACCACCTTACAACCTTACACAGCCCCACTGGGTCCACCCA  
CACATAAACCCCTGGTTCGACATTTTTTCG-----

>C2A2

ATGGAGCTTTAGACACCAAGACAGATCATGTTAATGACCCTAAATAAAGGAACAAACCA  
AATGGAATCTGTCCTAATGTCTTTG~-----

>C2B1

ATGGAGCTTTAGACACCAAGGCATATCATGTCAAACACCCCTAAACAAAGGACTAAACC  
AAATGAATCATAGCCCCCATGTCTTTG-----

>C2C1

ATGGAGCTTTAGACACCAAGGCATATCATGTCAAACACCCCTAAACAAAGGACTAAACC  
AAATGAATCATGACCCCATGTCTTTG-----

>C3A3

TATGGAGCTTTAGACACCAAGGCATATCATGTTAAACACCCCTAAATAAAGGACCAAAC  
CAAATGAATTATGCCCCCATGTCTTTG-----

>C2C2

TTGGAGCTTAAGATAACAAGATCAACTATGTCAAGAACCCTAAAAGTTAAACTAAATAGC  
AACTGATCCTTATCTTCG-----

>C3A1

ATGGAGCTTTAGACACCCGGCAGATCACGTAAATAACCTTGAATTAACAAGTAAAAACG  
CAGTGACCCCTAGCCCATATGTCTTTG-----

>C3B1

ATGGAGCTTTAGACGCCACCAACCGCGAAGAGCACCCCGACGACGGGCCACCAAATA  
ACGCGACCATGGTATAAACGTCTTCG-----

>C3C1

ATGGAGCTTTAAGACACTAAGCCATATCAAGTTAAATACCCCTAACAAGGGGCCAAAC  
TTATTGAAATCATTGGCCGTATGTCTTCG-----

>C3C2

GTGGAACCTTTAAAATCACGACCACCTTACAACCTTACACAGCCCCACTGGGTCCACCCA  
CACATAAACCCCTGGTTCGACATTTTTTCG-----

>C3A2

ATGGAGCTTAAGGCGCCAGAACAGCTCACGTCAAACACCCCCGCATAAAGGGAATAAA  
CCAAGTGGACCCTGCTCTAGTGTCTTTG-----

>C3D

ATGGAGCTTTAGACACCAAGGCATATCATGTTAAACACCCCTAAACAAAGGGCTAAACC

AAATGAATCATGCCCCCATGTCTTTG-----

>C3E1

ATGGAGCTTTAAGACATCTAAGCCATATCAAGTTAAATACCCCCTAACAAGGGGCCAAA  
CTTATTGAAATCATTGGCCGTATGTCTTCG-----

>C3E2

ATGGAGCTTTAAGACACTAAGCCATATCAAGTTAAATACCCCCTAACAAGGGGCCAAAC  
TTATTGAAATCATTGGCCGTATGTCTTCG-----

>C4A1

ATGGAGCTTTAGACACCAAGGCATATCATGTCAAACACCCCTAAACAAAGGACTAAACC  
AAATGAATCATGCCCCCATGTCTTTG-----

>C4A2

ATGGAGCTTTAGACACTAGCCAAGTATGAATAAGCGGCCGCATTAAATGGCCCCAAGCA  
CCCGTAGCCTTCTGGTAATGTGTCTTAG-----

>C2D1

GTGGAACTTTAAAATCACGACCACCTTACAACCTTACACAGCCCCACTGGGTCCACCCA  
CACATAAACCCCTGGTCGACATTTTTTCG-----

>C4C1

ATGGAGCTTTAGACACCAAGGCATATCATGTCAAACACCCCTAAACAAAGGACTAAACC  
AAATGAATCATGCCCCCATGTCTTTG-----

>C4C2

CTATGGAGCTTTAGACACCAAGGCATATCATGTCAAACACCCCTAAACAAAGGACTAAA  
CCAAATGAATCATGCCCCCATGTCTTTG-----

>C4D

ATGGAGCTTTAAGACACTAAGCCATATCAAGTTAAATACCCCCTAACAAGGGGCCAAAC  
TTATTGAAATCATTGGCCGTATGTCTTCG-----

>C5A

ATGGAGCTTTAGACACCAAGGCATATCATGTAAACACCCCTAAATAAAGGACCAAACC  
AAATGAATTATGCCCCCATGTCTTTG-----

>C5C

GTGGAACTTTAAAATCACGACCACCTTACAACCTTACACAGCCCCACTGGGTCCACCCA  
CACATAAACCCCTGGTCGACATTTTTTCG-----

>C5B

ATGGAGCTTTAGACACCAAGGCATATCATGTAAACACCCCTAAATAAAGGACCAAACC  
AAATGAATTATGCCCCCATGTCTTTG-----

>CC5G

TATGGAGCTTTAGACACCCGGCAGATCACGTAAAAAACCTTGAATTAACAAGTAAAAAC  
GCAGTGACCCCTAGCCCATATGTCTTTG-----

>C6A1

ATGGAGCTTTAGACACTAGGGCAGATCACGTTAAACAACCTCCCAATAAAGAACAAAAC  
TGAATGAGTCCTGCTTAAATGTCTTCG-----  
>C6A2  
GTGGAACCTTTAAAATCACGACCACCTTACAACCTTACACAGCCCCACTGGGTCCACCCA  
CACATAAACCCCTGGTCGACATTTTTTCG-----  
>C5I  
GGAGCTTTAGACGCCACCAACCTGCGAAGAGCACCCCGACGACGGGCCACCAAATAA  
CGCGACCATGGTATAAACGTCTTCG-----  
>C6A3  
TATGGAGCTTTAGACACTAGCCAAGTATGAATAAGCGGCCGCATTAAATGGCCCCAAGC  
ACCCGTAGCCTTCTGGTAATGTGTCTTAG-----  
>C6A6  
ATGGAGCTTTAGACACCAGCTAACTGTGAACTAGCGAATGAATAATAAATCTTCCCATAC  
ACCCACAGACCCTGGTAATGTGTCTTAG~~~~-----  
>C6D2  
ATGGAGCTTTAGACACCAGCTAACTGTGAAATAGGAATGAATAATAAATCTTCCCATACA  
CCCACAGACCCTGGTAATGTGTCTTAG-----  
>C6E2  
TATGGAGCTTTAGACACCAGAATAGCACATGTTAAGACACCCTGAATAAAGAACTGAAC  
TTAATGGCCCCCTATTCCAATGTCTTCG-----  
>D3A  
GTGGAACCTTTAAAATCACGACCACCTTACAACCTTACACAGCCCCACTGGGTCCACCCA  
CACATAAACCCCTGGTCGACATTTTTTCG-----  
>D3B1  
ATGGAGCTTTAACTAACCAACCCAAAGAGAATAGATTAAACCATTAAGGAATAACAACA  
ATCTCCATGAGTTGGTAGTTTCG-----  
>D3B2  
GTGGAACCTTTAAAATCACGACCACCTTACAACCTTACACAGCCCCACTGGGTCCACCCA  
CACATAAACCCCTGGTCGACATTTTTTCG-----  
>D3C2  
GTGGAACCTTTAAAATCACGACCACCTTACAACCTTACACAGCCCCACTGGGTCCACCCA  
CACATAAACCCCTGGTCGACATTTTTTCG~~~~-----  
>D3C3  
GTGGAACCTTTAAAATCACGACCACCTTACAACCTTACACAGCCCCACTGGGTCCACCCA  
CACATAAACCCCTGGTCGACATTTTTTCG-----  
>D38\_16F  
GTGGAACCTTTAAAATCACGACCACCTTACAACCTTACACAGCCCCACTGGGTCCACCCA  
CACATAAACCCCTGGTCGACATTTTTTCG~-----

>D1B1

ATGGAGCTTTAGACACCAAGGCATATCATGTTAAACACCCCTAAACAAAGGGCTAAACC  
AAATGAATCATGCCCCCATGTCTTTG-----

>D1B2

GTGGAACTTTAAAATCACGACCACCTTACAACCTTACACAGCCCCACTGGGTCCACCCA  
CACATAAACCCCTGGTCGACATTTTTTCG-----

>D1C1

ATGGAGCTTTAGACACCAAGGCATATCATGTTAAACACCCCTAAACAAAGGGCTAAACC  
AAATGAATCATGCCCCCATGTCTTTG-----

>D1C2

ATGGAGCTTTAAGACATAAGCCATATCAAGTTAAATACCCCTAACAAAGGGGCCAAACT  
TATTGAAATCATTGGCCGTATGTCTTCG~-----

>D1D1

GTGGAACTTTAAAATCACGACCACCTTACAACCTTACACAGCCCCACTGGGTCCACCCA  
CACATAAACCCCTGGTCGACATTTTTTCG-----

>D1D2

ATGGAGCTTTAGACACCCGGCAGATCACGTAAAAACCTTGAATTAACAAGTAAAAAC  
GCAGTGACCCCTAGCCCATATGTCTTTG~-----

>D1D3

ATGGAGCTTTAACTAACCAACCCAAAGAGAATAAATTTAACCATTAAGGAGTAACAACA  
ATCTCCATGAGTTGGTAGTTTCG-----

>D2A

ATGGAGCTTTAAGACACTAAGCCATATCAAGTTAAATACCCCTAACAAAGGGGCCAAAC  
TTATTGAAATCATTGGCCGTATGTCTTCG-----

>D2B

ATGGAGCTTTAGACACCAAGGCATATCATGTTAAACACCCCTAAATAAAGGACCAAACC  
AAATGAATTATGCCCCCATGTCTTTG-----

>D3C1

TATGGAGCTTTCAGACGCCAGAACAGACCACGTTAAGCACTCCTGAAATAAAGGATAA  
AACTGATTGACCCCTGTCCTAATGTCTTTG-----

>D2C1

ATGGAGCTTTAGACACCAAGGCATATCATGTTAAACACCCCTAAATAAAGGACCAAACC  
AAATGAATTATGCCCCCATGTCTTTG-----

>D2C2

ATGGAGCTTTAGACGCCACCAACCGCGAAGAGCACCCCGACGACGGGCCACCAAATA  
ACGCGACCATGGTATAAACGTCTTCG-----

>D2D2

TATGGAGCTTTAGACACCAAGGCATATCATGTTAAACACCCCTAAATAAAGGACCAAAC

CAAATGAATTATGCCCCCATGTCTTTG-----

>D2E2

ATAAAGCTTTACAATTATTTAATTAAATTATAAATTGTTGGTTTAACTTGATTTAATTAATAT  
TTGTTTC-----

>D2F2

GTGGAACTTTAAAATCACGACCACCTTACAACCTTACACAGCCCCACTGGGTCCACCCA  
CACATAAACCCCTGGTCGACATTTTTTCG~-----

>D2F3

ATGGAGCTTTAGACACCAGCTAACTGTGAACTAGCGAATGAATAATAAATCTTCCCATAC  
ACCCACAGACCCTGGTAATGTGTCTTAG-----

>D2G2

GTGGAACTTTAAAATCACGACCACCTTACAACCTTACACAGCCCCACTGGGTCCACCCA  
CACATAAACCCCTGGTCGACATTTTTTCG-----

>D2G3

ATGGAGCTTTAGACACCAAGGCATATCATGTCAAACACCCCTAAACAAAGGACTAAACC  
AAATGAATCATGCCCCCATGTCTTTG-----

>E1C1

GTGGAACTTTAAAATCACGACCACCTTACAACCTTACACAGCCCCACTGGGTCCACCCA  
CACATAAACCCCTGGTCGACATTTTTTCG-----

>E1D2

GTGGAACTTTAAAATCACGACCACCTTACAACCTTACACAGCCCCACTGGGTCCACCCA  
CACATAAACCCCTGGTCGACATTTTTTCG-----

>E1E1

ATGGAGCTTTAGACACCAAGGCATATCATGTCAAACACCCCTAAACAAAGGACTAAACC  
AAATGAATCATGCCCCCATGTCTTTG-----

>E21\_16F

ATGGAGCTTTAGACACTAGCCAAGTATGAATAAGCGGCCGCATTAAATGGCCCCAAGCA  
CCCGTATCCTTCTGGTAATGTGTCTTAT-----

>E1F1

ATGGAGCTTTAGACACCAAGGCATATCATGTCAAACACCCCTAAACAAAGGACTAAACC  
AAATGAATCATGCCCCCATGTCTTTG-----

>E2A

ATGGAGCTTTAGACACTAGGGCAGATCACGTTAAACAACCTCCCAATAAAGAACAAAAC  
TGAATGAGTCCTGCTTAAATGTCTTCG-----

>E2C

AGGGAGCTTTAGACACCAAGGCATATCATGTCAAACACCCCTAAACAAGGGACTAAAC  
CAAATGAATCATGCCCCCATGTCTTTG-----

>E2D1



ATGGAGCTTTAGACACCAAGGCATATCATGTCAAACACCCCTAAACAAAGGACTAAACC  
AAATGAATCATGCCCCCATGTCTTTG-----

>E2D2

GTGGAACCTTTAAAATCACGACCACCTTACAACCTTACACAGCCCCACTGGGTCCACCCA  
CACATAAACCCCTGGTCGACATTTTTTCG~-----

>E2D3

ATGGAGCTTTAGACACCAAGGCAGATCACGTCAAAAACCTTGAATTAACAAGTAAAAAC  
GCAGTGACCCCTAGCCCATATGTCTTTG-----

>E2E1

ATGGAGCTTTAGACACCAAGGCATATCATGTCAAACACCCCTAAACAATAGGACTAAAC  
CAAATGAATCATGCCCCCATGTCTTTG-----

>E2E3

ATGGAGCTTTAGACACCAAGGCAGCTAACTGTGAACTAGCGAATGAATAATAAATCTTCCCATAC  
ACCCACAGACCCTGGTAATGTGTCTTAG-----

>C5F2

GTGGAACCTTTAAAATCACGACCACCTTACAACCTTACACAGCCCCACTGGGTCCACCCA  
CACATAAACCCCTGGTCGACATTTTTTCG-----

>E3A1

GTGGAACCTTTAAAATCACGACCACCTTACAACCTTACACAGCCCCACTGGGTCCACCCA  
CACATAAACCCCTGGTCGACATTTTTTCG-----

>E3A2

GTGGAACCTTTAAAATCACGACCACCTTACAACCTTACACAGCCCCACTGGGTCCACCCA  
CACATAAACCCCTGGTCGACATTTTTTCG~-----

>E3B1

GTGGAACCTTTAAAATCACGACCACCTTACAACCTTACACAGCCCCACTGGGTCCACCCA  
CACATAAACCCCTGGTCGACATTTTTTCG-----

>E3B2

GTGGAACCTTTAAAATCACGACCACCTTACAACCTTACACAGCCCCACTGGGTCCACCCA  
CACATAAACCCCTGGTCGACATTTTTTCG-----

>E3B3

ATGGAGCTTTAGACACCAAGGCATATCATGTAAACACCCCTAAACAAAGGACTAAACC  
AAATGAATCATGCCCCCATGTCTTTG-----

>E3C1

ATGGAGCTTTAGACACCAAGGCATATCATGTCAAACACCCCTAAACAAAGGACTAAACC  
AAATGAATCATGCCCCCATGTCTTTG~-----

>E3D1

ATGGAGCTTTAGACACCAAGGCATATCATGTCAAACACCCCTAAACAAAGGACTAAACC  
AAATGAATCATGCCCCCATGTCTTTG-----

>E3D2

ATGGAGCTTTAGACACCAGCTAACTGTGAACTAGCGAATGAATAATAAATCTTCCCATGC  
ACCCACAGACCCTGGTAATGTGTCTTAG~-----

>E3E1

ATGGAGCTTTAGACACCAAGGCATATCATGTCTAAACACCCCTAAACAAAGGACTAAAC  
CAAATGAATCATGCCCCCATGTCTTTG-----

>E4A1

ATGGAGCTTTAGACACCAAGGCATATCATGTAAACACCCCTAAACAAAGGACTAAACC  
AAATGAATCATGCCCCCATGTCTTTG-----

>E4A2

GTGGAGCTTTAGACGCTAAGACAGATCTTATTAATTTATCCTAAAATAACAGGATAAAA  
ACTAAATTAGAACCCTGCCTGCATGTCTTTG-----

>E4B1

ATGGAGCTTTAGACACCAAGGCATATCATGTCTAAACACCCCTAAACAAAGGACTAAAC  
CAAATGAATCATGCCCCCATGTCTTTG~-----

>F6\_16F

ATGGAGCTTTAGACACCAAGGCATATCATGTAAACACCCCTAAATAAAGGACCAAACC  
AAATGAATTATGCCCCCATGTCTTTG-----

>E4D1

ATGGAGCTTTAGACACCAAGGCATATCATGTAAACACCCCTAAATAAAGGACTAAACC  
AAATGAATTATGCCCCCATGTCTTTG~-----

>E4E1

ATGGAGCTTTAGACACCAAGGCATATCATGTAAACACCCCTAAATAAAGGACTAAACC  
AAATGAATTATGCCCCCATGTCTTTG-----

>E4E2

ATGGAGCTTTAGACACCAAGGCATATCATGTAAACACCCCTAAACAAAGGACTAAACC  
AAATGAATCATGCCCCCATGTCTTTG-----

>F1E1

ATGGAGCTTTAGACACCAAGGCATATCATGTAAACACCCCTAAATAAAGGACCAAACC  
AAATGAATTATGCCCCCATGTCTTTG-----

>F4A1

ATGGAGCTTTAGACACCAAGGCATATCATGTAAACACCCCTAAATAAAGGACCAAACC  
AAATGAATTATGCCCCCATGTCTTTG-----

>F4A2

ATGGAGCTTTAGACACCAGCCAAGTGTGAAATAGCGATTAATACACCTTATTCCCAAACA  
TCCGCAGCCTCTGGTAAAGTGTCTTAG-----

>F4C1

ATGGAGCTTTAGACACCAAGGCATATCATGTCAAACACCCCTAAACAAAGGACTAAACC

AAATGAATCATGCCCCCATGTCTTTG-----

>F4D1

GTGGAACTTTAAAATCACGACCACCTTACAACCTTACACAGCCCCACTGGGTCCACCCA  
CACATAAACCCCTGGTTCGACATTTTTCG-----

>F4D2

ATGGAGCTTTAGACACCAAGGCATATCATGTCAAACACCCCTAAACAAAGGACTAAACC  
AAATGAATCATGCCCCCATGTCTTTG-----

>F4D3

TTGGAGCTTAAGATATAAGATCAACTATGTCAAGAACCCTAAAAGTTAACTAAATAGCA  
ACTGATCCTTATCTTCG-----

>G10

ATGGAGCTTTAGACACCAAGGCATATCATGTAAACACCCCTAAATAAAGGACCAAACC  
AAATGAATTATGCCCCCATGTCTTTG-----

>G11

ATGGAGCTTTAGACACCAAGGCAGAACATGTAAAGTACCCCTAAACAAGGGCCGAACC  
GAATGAACCCTGCCCAATGTCTTTG-----

>F5A1

ATGGAGCTTTAGACACCAAGGCATATCATGTAAACACCCCTAAACAAAGGGCTAAACC  
AAATGAATCATGCCCCCATGTCTTT-----

>F5A2

ATGGAGCTTTAGACGCCACCAACCGCGAAGAGCACCCCGACGACGGGCCACCAAATA  
ACGCGACCATGGTATAAACGTCTTCG-----

>F5B1

ATGGAGCTTTAGACACCAAGGCATATCATGTAAACACCCCTAAATAAAGGACCAAACC  
AAATGAATTATGCCCCCATGTCTTTG-----

>F5C1

ATGGAGCTTTAGACACCAAGGCATATCATGTCAAACACCCCTAAACAAAGGACTAAACC  
AAATGAATCATGCCCCCATGTCTTTG-----

>F5C2

ATGGAGCTTTAGACACTAGCCAACTGTGAATAAGCGACTGAACTGAGCAAGTCCTAAAT  
ACCCGCAGCCTTATGGTAATGTAGTCTTAG~-----

>F5D1

ATGGAGCTTTAGACACCCGGCAGATCACGTAAAAAACCTTGAATTAACAAGTAAAAAC  
GCAGTGACCCCTAGCCCATATGTCTTTG-----

>F5D2

ATGGAGCTTTAGACACCAGCTAACTGTGAACTAGCGAATGAATAATAAATCTTCCCATAC  
ACCCACAGACCCTGGTAATGTGTCTTAG-----

>F6A

ATGGAGCTTTAGACACCAAGGCATATCATGTTAAACACCCCTAAATAAAGGACCAAACC  
AAATGAATTATGCCCCCATGTCTTTG-----

>F6B1

TGGAGCTTTAGACACCAAGGCATATCATGTTAAACACCCCTAAATAAAGGACCAAACCA  
AAATGAATTATGCCCCCATGTCTTTG-----

>F6B2

ATGGAGCTTTAGACACCAAGGCATATCATGTTAAACACCCCTAAATAAAGGACCAAACC  
AAATGAATTATGCCCCCATGTCTTTG-----

>F6B3

ATGGAGCTTTAGACACCAAGGCATATCATGTTAAACACCCCTAAATAAAGGACCAAACC  
AAATGAATTATGCCCCCATGTCTTTGGT-----

>G1A1

ATGGAGCTTTAGACACCAAGGCATATCATGTTAAACACCCCTAAATAAAGGACCAAACC  
AAATGAATTATGCCCCCATGTCTTTG-----

>G1A2

ATGGAGCTTTAGACACCAAGGCATATCATGTTAAACACTCCCTAAATAAAGGACCAAAC  
CAAATGAATTATGCCCCCATGTCTTTG-----

>I2B2

GTGGAACTTTAAAATCACGACCACCTTACAACCTTACACAGCCCCACTGGGTCCACCCA  
CACATAAACCCCTGGTCGACATTTTTTCG-----

>I2B3

ATGGAGCTTTAGACACTAGCCAAGTATGAATAAGCGGCCGCATTAAATGGCCCCAAGCA  
CCCGTAGCCTTCTGGTAATGTGTCTTAG-----

>J1A1

ATGGAGCTTTAGACACCAAGGCATATCATGTTAAACACCCCTAAATAAAGGACCAAACC  
AAATGAATTATGCCCCCATGTCTTTG-----

>J1A2

ATGGAGCTTTAGACACCCGGCAGATCACGTAAATAACCTTGAATTAACAAGTAAAAACG  
CAGTGACCCCTAGCCCAT~~~~~ATGTCTTTG

>J1B1

ATGGAGCTTTAGACACCAAGGCATATCATGTTAAACACCCCTAAATAAAGGACCAAACC  
AAATGAATTATGCCCCCATGTCTTTG-----

>J1B2

ATGGAGCTTTAGACACCCGGCAGATCACGTAAAAAACCTTGAATTAACAAGTAAAAAC  
GCAGTGACCCCTAGCCCATATGTCTTTG-----

>J1B3

ATGGAGCTTTAGACACCCGGCAGATCACGTAAAAAACCTTGAATTAACAAGTAAAAAC  
GCAGTGACCCCTAGCCCATATGTCTTTG-----

>J1C1

ATGGAGCTTTAGACACCAAGGCATATCATGTTAAACACCCCTAAATAAAGGACCAAACC  
AAATGAATTATGCCCCCATGTCTTTG-----

>J1C2

ATGGAGCTTTAGACACCAAGGCATATCATGTCAAACACCCCTAAACAAAGGACCTAAAC  
CAAATGAATCATGCCCCCATGTCTTTG-----

>J1D1

ATGGAGCTTTAGACACCAAGGCATATCATGTTAAACACCCCTAAATAAAGGACCAAACC  
AAATGAATTATGCCCCCATGTCTTTG-----

>J1D2

ATGGAGCTTTAGACACTAGCCAAGTATGAATAAGCGGCCGCATTAAATGGCCCCAAGCA  
CCCGTAGCCTTCTGGTAATGTGTCTTAG-----

>J2A1

ATGGAGCTTTAGACACCAAGGCATATCATGTCAAACACCCCTGAACAAAGGACTAAACC  
AAATGAATCATGCCCCCATGTCTTTG-----

>J2A2

ATGGAGCTTTAGACACTAGCCAAGTGTGAATAAGCGACTGAACTGAGCAAGTCCTAAAT  
ACCCGCAGCCTTATGGTAATGTAGTCTTAG-----

>J2B1

ATGGAGCTTTAGACACCAAGGCATATCATGTTAAACACCCCTAAATAAAGGACCAAACC  
AAATGAATTATGCCCCCATGTCTTTG-----

>J2B2

ATGGAGCTTTAGACACTAGCCAAGTATGAATAAGCGGCCGCATTAAATGGCCCCAAGCA  
CCCGTAGCCTTCTGGTAATGTGTCTTAG-----

>J2C2

GTGGAACTTTAAAATCACGACCACCTTACAACCTTACACAGCCCCACTGGGTCCACCCA  
CACATAAACCCCTGGTCGACATTTTTTCG-----

>I3B2

ATGGAGCTTTAGACACTAGGGCAGATCACGTTAAACAACCTCCCAATAAAGAACAAAAC  
TGAATGAGTCCTGCTTAAATGTCTTCG-----

>I3C1

GTGGAACTTTAAAATCACGACCACCTTACAACCTTACACAGCCCCACTGGGTCCACCCA  
CACATAAACCCCTGGTCGACATTTTTTCG-----

>I3C4

GTGGAACTTTAAAATCACGACCACCTTACAACCTTACACAGCCCCACTGGGTCCACCCA  
CACATAAACCCCTGGTCGACATTTTTTCG-----

>I3D1

ATGGAGCTTTAGACACCAAGGCATATCATGTTAAACACCCCTAAATAAAGGACCAAACC

AAATGAATTATGCCCCCATGTCTTTG-----

>I3D2

ATGGAGCTTTAGACACCAAGGCATATCATGTTAAACACCCCTAAATAAAGGACCAAACC  
AAATGAATCATGCCCCCATGTCTTTG-----

>I1A1

GTGGAACCTTTAAAATCACGACCACCTTACAACCTTACACAGCCCCACTGGGTCCACCCA  
CACATAAACCCCTGGTCGACATTTTTTCG-----

>I1A2

ATGGAGCTTTAGACACCAAGGCATATCATGTTAAACACCCCTAAATAAAGGACCAAACC  
AAATGAATTATGCCCCCATGTCTTTG-----

>I1B1

ATGGAGCTTTAGACACCAAGGCATATCATGTTAAACACCCCTAAATAAAGGACCAAACC  
AAATGAATTATGCCCCCATGTCTTTG~-----

>I2B1

ATGGAGCTTTAGACACCAAGGCATATCATGTTAAACACCCCTAAATAAAGGACCAAACC  
AAATGAATTATGCCCCCATGTCTTTG-----

>I6\_M13F(-20)

GTGGAACCTTTAAAATCACGACCACCTTACAACCTTACACAGCCCCACTGGGTCCACCCA  
CACATAAACCCCTGGTCGACATTTTTTCG-----

>I2D2

ATGGAGCTTTAGACACCCGGCAGATCACGTAAAAAACCTTGAATTAACAAGTAAAAAC  
GCAGTGACCCCTAGCCCATATGTCTTTG~-----

>C1D2

ATGGAGCTTTAGACACCAGGCAGATCACGTCAAAAACCTTGAATTAACAAGTAAAAAC  
GCAGTGACCCCTAGCCCATATGTCTTTG-----

>E4B2

GTGGAGCTTTAGGTAAGGTTGTCCCACTAAACATATTCAAATAAAAGTATTCAAGAA  
GGGCATCAATCCGATTATCTTTG-----

>F4C2

ATGGAGCTTTAGACACTAGCCAAGTATGAATAAGCGGCCGCATTAAATGGCCCCAAGCA  
CCCGTAGCTTCTGGTAATGTGTCTTAG-----

>C1F2

ATGGAGCTTTAGACACCAAGGCATATCATGTTAAACACCCCTAAATAAAGGGCTAAACC  
AAATGAATCATGCCCCCATGTCTTTG-----

>E2B2

ATGGAGCTTTAGACACTAGCCAAGTATGAATAAGCGGCCGCATTAAATGGCCCCAAGCA  
CCCGTAGCCTTCTGGTAATGTGTCTTAG-----

>I2D1

AGGGAGCTTTAGACACCAAGGCATATCATGTTAAACACCCCTAAATAAAGGACCAAACC  
AAATGAATTATGCCCCCATGTCTTTG-----

>F5B2

ATGGAGCTTTAGACACCAGGCAGATCACGTCAAAAACCTTGAATTAACAAGTAAAAAC  
GCAGTGACCCCCTAGCCCATATGTCTTTG-----

>E3E2

ATGGAGCTTAAAACACAAGATCAACTATGCTATCAAGCCAACCACCCACGGAAATAACA  
GCTAAAAGCATAATAGTACCCTGATCCTAATGTTTTCG-----

>E4D2

ATGGAGCTTTAGACACCAAGGCATATCATGTTAAACACCCCTAAACAAAGGACTAAACC  
AAATGAATCATGCCCCCATGTCTTTG-----

>L1A

ATGGAGCTTTAGACACCAAGGCATATCATGTTAAACACCCCTAAACAAAGGGCTAAACC  
AAATGAATCATGCCCCCATGTCTTTG-----
