# Supplementary material for: DNA mini-barcoding reveals the mislabeling rate of canned cat food in Taiwan
Source: PeerJ journal article supplement (doi:10.7717/peerj.16833), 2024-02-21
Supplement: TableS1.pdf [file TableS1.pdf]

1 Table S1. List of all collected canned cat food products and results of BLAST analysis from *I6S* rRNA barcodes.

| Date       | No. | Product code | Brand | Chinese label                      | English label             | Declared ingredients<br>(Chinese) | Place of manufacture | Tissue sample code | Sequencing method† | 16S BLAST results                     | Mislabeled                     | Data access                    |
|------------|-----|--------------|-------|------------------------------------|---------------------------|-----------------------------------|----------------------|--------------------|--------------------|---------------------------------------|--------------------------------|--------------------------------|
| 2021.02.02 | 1   | B1A          | SEEDS | Hello Fresh 好鮮原汁湯<br>罐 (清蒸鯖魚)      | Mackerel                  | 鯖魚                                | Thailand             | B1A                | Sanger (+)         | <i>Decapterus russelli</i>            | Yes                            | Supplementary<br>Information 2 |
|            |     |              |       |                                    |                           |                                   |                      |                    |                    | <i>Decapterus maruadsi</i>            |                                |                                |
|            |     |              |       |                                    |                           |                                   |                      |                    |                    | <i>Caranx sexfasciatus</i>            |                                |                                |
|            |     |              |       |                                    |                           |                                   |                      |                    |                    | <i>Selar crumenophthalmus</i>         |                                |                                |
|            | 2   | B1B          | SEEDS | Hello Fresh 好鮮原汁湯<br>罐 (清蒸鯖魚)      | Tuna                      | 鯖魚                                | Thailand             | B1B                | Sanger (+)         | <i>Katsuwonus pelamis</i>             | No                             | Supplementary<br>Information 2 |
|            |     |              |       |                                    |                           |                                   |                      |                    |                    | <i>Thunnus albacares</i> <sup>a</sup> |                                |                                |
|            | 3   | B1C          | SEEDS | Tuna 愛貓天然食 (兩<br>倍鮮嫩雞肉 + 白身鯖<br>魚) | Chicken & Tuna light meat | 白身鯖魚<br><br>雞肉                    | Thailand             | B1C1               | Sanger (+)         | <i>Katsuwonus pelamis</i>             | No                             | Supplementary<br>Information 2 |
|            |     |              |       |                                    |                           |                                   |                      |                    |                    | <i>Thunnus albacares</i> <sup>a</sup> |                                |                                |
|            |     |              |       |                                    |                           |                                   |                      | B1C2               | Sanger (+)         | <i>Gallus gallus</i>                  | Supplementary<br>Information 2 |                                |

|            |   |     |         |                     |                                    |      |          |      |             |                                      |     |                             |
|------------|---|-----|---------|---------------------|------------------------------------|------|----------|------|-------------|--------------------------------------|-----|-----------------------------|
|            | 4 | B1D | YAMI 亞米 | 健寶 鮪魚蟹柳活力餐          |                                    | 鮪魚   | Thailand | B1D1 | Sanger (+)  | <i>Euthynnus affinis</i>             | Yes | Supplementary Information 2 |
|            |   |     |         |                     |                                    | 蟹柳   |          | B1D2 | Sanger (-)* |                                      |     |                             |
| 2021.02.23 | 5 | B2A | SEEDS   | MamaMia 貓餐罐         | Chicken                            | 雞肉   | Thailand | B2A  | Sanger (+)  | <i>Gallus gallus</i>                 | No  | Supplementary Information 2 |
|            | 6 | B2B | SEEDS   | MamaMia 貓餐罐         | Chicken + tuna light meat + tomato | 雞肉   | Thailand | B2B1 | Sanger (+)  | <i>Gallus gallus</i>                 | Yes | Supplementary Information 2 |
|            |   |     |         |                     |                                    | 白身鮪魚 |          | B2B2 | Sanger (+)  | <i>Euthynnus lineatus</i>            |     | Supplementary Information 2 |
|            | 7 | B2F | SEEDS   | Tuna 愛貓天然食          | Light tuna meat & shirasu          | 白身鮪魚 | Thailand | B2F1 | Sanger (+)  | <i>Katsuwonus pelamis</i>            | No  | Supplementary Information 2 |
|            |   |     |         |                     |                                    | 吻仔魚  |          |      |             | <i>Thunnus albacares<sup>a</sup></i> |     | Supplementary Information 2 |
|            |   |     |         |                     |                                    |      |          | B2F2 | Sanger (+)  | <i>Encrasicholina punctifer</i>      |     | Supplementary Information 2 |
|            | 8 | B2G | SEEDS   | Bistro Cat 特級銀貓健康餐罐 | Tuna light meat + shrimp           | 白身鮪魚 | Thailand | B2G1 | Sanger (+)  | <i>Katsuwonus pelamis</i>            | No  | Supplementary Information 2 |
|            |   |     |         |                     |                                    | 蝦肉   |          |      |             | <i>Thunnus albacares<sup>a</sup></i> |     |                             |
|            |   |     |         |                     |                                    |      |          | B2G2 | Sanger (-)* |                                      |     |                             |

|            |     |       |                                 |                  |          |          |            |                                      |                                      |                                |                                |
|------------|-----|-------|---------------------------------|------------------|----------|----------|------------|--------------------------------------|--------------------------------------|--------------------------------|--------------------------------|
| 9          | B2H | SEEDS | Hello Fresh 好鮮原汁湯<br>罐(清蒸雞肉&牛肉) | Chicken & beef   | 雞肉       | Thailand | B2H1       | Sanger (+)                           | <i>Gallus gallus</i>                 | No                             | Supplementary<br>Information 2 |
|            |     |       |                                 |                  | 牛肉       |          | B2H2       | Sanger (+)                           | <i>Bos taurus</i>                    |                                | Supplementary<br>Information 2 |
| 2021.02.26 | 10  | B3A   | GOEN                            | 御宴湯罐 白身鮪魚+雞<br>肉 | 白身鮪魚     | Thailand | B3A1       | Sanger (+)                           | <i>Katsuwonus pelamis</i>            | No                             | Supplementary<br>Information 2 |
|            |     |       |                                 |                  | 雞肉       |          |            |                                      | <i>Thunnus albacares<sup>a</sup></i> |                                | Supplementary<br>Information 2 |
| 11         | B3B | GOEN  | 御宴湯罐 白身鮪魚+鮭<br>魚                | 白身鮪魚             | Thailand | B3B1     | Sanger (+) | <i>Katsuwonus pelamis</i>            | No                                   | Supplementary<br>Information 2 |                                |
|            |     |       |                                 | 鮭魚               |          |          |            | <i>Thunnus albacares<sup>a</sup></i> |                                      | Supplementary<br>Information 2 |                                |
| 12         | B3C | GOEN  | 御宴湯罐 白身鮪魚+鯛<br>魚                | 白身鮪魚             | Thailand | B3C1     | Sanger (+) | <i>Katsuwonus pelamis</i>            | No                                   | Supplementary<br>Information 2 |                                |
|            |     |       |                                 | 鯛魚               |          |          |            | <i>Thunnus albacares<sup>a</sup></i> |                                      | Supplementary<br>Information 2 |                                |
|            |     |       |                                 |                  |          |          | B3C2       | Sanger (+)                           | <i>Priacanthus tayenus</i>           |                                | Supplementary<br>Information 2 |

|    |     |      |               |      |          |      |             |                                       |     |                             |
|----|-----|------|---------------|------|----------|------|-------------|---------------------------------------|-----|-----------------------------|
| 13 | B3D | GOEN | 御宴湯罐 白身鯖魚+鮮蝦  | 白身鯖魚 | Thailand | B3D1 | Sanger (+)  | <i>Katsuwonus pelamis</i>             | No  | Supplementary Information 2 |
|    |     |      |               | 鮮蝦   |          |      |             | <i>Thunnus albacares<sup>a</sup></i>  |     |                             |
|    |     |      |               |      |          | B3D2 | Sanger (+)  | <i>Metapenaeopsis barbata</i>         |     | Supplementary Information 2 |
|    |     |      |               |      |          |      |             | <i>Metapenaeopsis palmensis</i>       |     |                             |
| 14 | B3E | GOEN | 御宴湯罐 白身鯖魚+吻仔魚 | 白身鯖魚 | Thailand | B3E1 | Sanger (+)  | <i>Katsuwonus pelamis</i>             | No  | Supplementary Information 2 |
|    |     |      |               | 吻仔魚  |          |      |             | <i>Thunnus albacares<sup>a</sup></i>  |     |                             |
|    |     |      |               |      |          | B3E2 | Sanger (+)  | <i>Engraulis japonicus</i>            |     | Supplementary Information 2 |
|    |     |      |               |      |          |      |             |                                       |     |                             |
| 15 | B3F | 元氣家族 | 元氣家族金罐 鯖魚+鯛魚  | 鯖魚   | Thailand | B3F1 | Sanger (+)  | <i>Euthynnus affinis</i>              | Yes | Supplementary Information 2 |
|    |     |      |               | 鯛魚   |          |      |             | <i>Euthynnus lineatus<sup>b</sup></i> |     |                             |
|    |     |      |               |      |          | B3F2 | Sanger (+)  | <i>Priacanthus tayenus</i>            |     | Supplementary Information 2 |
|    |     |      |               |      |          |      |             |                                       |     |                             |
| 16 | B3G | 元氣家族 | 元氣家族金罐 鯖魚+吻仔魚 | 鯖魚   | Thailand | B3G1 | Sanger (-)* |                                       | No  |                             |

|    |     |      |               |     |          |      |             |                                        |     |                             |
|----|-----|------|---------------|-----|----------|------|-------------|----------------------------------------|-----|-----------------------------|
|    |     |      |               | 吻仔魚 |          | B3G2 | Sanger (+)  | <i>Engraulis japonicus</i>             |     | Supplementary Information 2 |
| 17 | B3H | 元氣家族 | 元氣家族金罐 鮪魚+鮮蝦  | 鮪魚  | Thailand | B3H1 | Sanger (+)  | <i>Euthynnus affinis</i>               | Yes | Supplementary Information 2 |
|    |     |      |               | 鮮蝦  |          |      |             | <i>Euthynnus lineatus</i> <sup>b</sup> |     |                             |
|    |     |      |               |     |          | B3H2 | Sanger (-)* | <i>Auxis thazard</i> <sup>c</sup>      |     |                             |
| 18 | B3I | 元氣家族 | 元氣家族金罐 鮪魚+雞肉  | 鮪魚  | Thailand | B3I1 | Sanger (+)  | <i>Euthynnus affinis</i>               | Yes | Supplementary Information 2 |
|    |     |      |               | 雞肉  |          |      |             | <i>Euthynnus lineatus</i> <sup>b</sup> |     |                             |
|    |     |      |               |     |          | B3I2 | Sanger (+)  | <i>Gallus gallus</i>                   |     | Supplementary Information 2 |
| 19 | B3J | 元氣家族 | 元氣家族金罐 鮪魚+蟹肉棒 | 鮪魚  | Thailand | B3J1 | Sanger (+)  | <i>Euthynnus affinis</i>               | Yes | Supplementary Information 2 |
|    |     |      |               |     |          |      |             | <i>Euthynnus lineatus</i> <sup>b</sup> |     |                             |
|    |     |      |               |     |          |      |             | <i>Auxis thazard</i> <sup>c</sup>      |     |                             |
|    |     |      |               | 蟹肉棒 |          | B3J2 | Sanger (+)  | <i>Euthynnus lineatus</i>              |     | Supplementary Information 2 |
|    |     |      |               |     |          |      |             | <i>Euthynnus lineatus</i> <sup>b</sup> |     |                             |

|            |    |     |      |              |      |          |      |             |                                        |     |                             |
|------------|----|-----|------|--------------|------|----------|------|-------------|----------------------------------------|-----|-----------------------------|
|            |    |     |      |              |      |          |      |             | <i>Auxis thazard</i> <sup>F</sup>      |     |                             |
|            | 20 | B3K | 元氣家族 | 元氣家族金罐 鮪魚+鮭魚 | 鮪魚   | Thailand | B3K1 | Sanger (+)  | <i>Euthynnus affinis</i>               | Yes | Supplementary Information 2 |
|            |    |     |      |              | 鮭魚   |          |      |             | <i>Euthynnus lineatus</i> <sup>b</sup> |     |                             |
|            |    |     |      |              |      |          | B3K2 | Sanger (-)* | <i>Auxis thazard</i> <sup>F</sup>      |     |                             |
| 2021.03.08 | 21 | C1A | 愛情貴族 | 白身鮪魚&牛肉      | 白身鮪魚 | Thailand | C1A1 | Sanger (+)  | <i>Katsuwonus pelamis</i>              | No  | Supplementary Information 2 |
|            |    |     |      |              | 牛肉   |          | C1A2 | Sanger (-)* | <i>Thunnus albacares</i> <sup>a</sup>  |     |                             |
|            | 22 | C1B | 愛情貴族 | 白身鮪魚&吻仔魚     | 白身鮪魚 | Thailand | C1B1 | Sanger (+)  | <i>Katsuwonus pelamis</i>              | No  | Supplementary Information 2 |
|            |    |     |      |              | 吻仔魚  |          | C1B2 | Sanger (-)* | <i>Thunnus albacares</i> <sup>a</sup>  |     |                             |
|            | 23 | C1C | 愛情貴族 | 白身鮪魚&雞肉      | 白身鮪魚 | Thailand | C1C1 | Sanger (-)* |                                        | No  |                             |
|            |    |     |      |              | 雞肉   |          | C1C2 | Sanger (+)  | <i>Gallus gallus</i>                   |     | Supplementary Information 2 |

|    |     |      |         |      |          |      |            |                                      |     |                                |
|----|-----|------|---------|------|----------|------|------------|--------------------------------------|-----|--------------------------------|
| 24 | C1D | 愛情貴族 | 白身鮪魚&鮭魚 | 白身鮪魚 | Thailand | C1D1 | Sanger (+) | <i>Katsuwonus pelamis</i>            | No  | Supplementary<br>Information 2 |
|    |     |      |         | 鮭魚   |          |      |            | <i>Thunnus albacares<sup>a</sup></i> |     |                                |
|    |     |      |         |      |          | C1D2 | Sanger (+) | <i>Oncorhynchus nerka</i>            |     | Supplementary<br>Information 2 |
| 25 | C1E | 愛情貴族 | 白身鮪魚&蟹肉 | 白身鮪魚 | Thailand | C1E1 | Sanger (+) | <i>Katsuwonus pelamis</i>            | No  | Supplementary<br>Information 2 |
|    |     |      |         | 蟹肉   |          |      |            | <i>Thunnus albacares<sup>a</sup></i> |     |                                |
|    |     |      |         |      |          | C1E2 | Sanger (+) | <i>Katsuwonus pelamis</i>            |     | Supplementary<br>Information 2 |
|    |     |      |         |      |          |      |            | <i>Thunnus albacares<sup>a</sup></i> |     |                                |
| 26 | C1F | 愛情貴族 | 白身鮪魚&柴魚 | 白身鮪魚 | Thailand | C1F1 | Sanger (+) | <i>Katsuwonus pelamis</i>            | Yes | Supplementary<br>Information 2 |
|    |     |      |         | 柴魚   |          |      |            | <i>Thunnus albacares<sup>a</sup></i> |     |                                |
|    |     |      |         |      |          | C1F2 | Sanger (+) | <i>Auxis rochei</i>                  |     | Supplementary<br>Information 2 |
|    |     |      |         |      |          |      |            | <i>Auxis thazard</i>                 |     |                                |
|    |     |      |         |      |          |      |            | <i>Euthynnus affinis<sup>d</sup></i> |     |                                |

|            |    |     |      |                   |     |        |            |                                                                                                                                  |                                                      |                                |                                |
|------------|----|-----|------|-------------------|-----|--------|------------|----------------------------------------------------------------------------------------------------------------------------------|------------------------------------------------------|--------------------------------|--------------------------------|
| 2021.03.11 | 27 | C2A | 每日貓罐 | 每日貓罐-雞肉+吻仔魚<br>湯罐 | 雞肉  | Taiwan | C2A1       | Sanger (+)                                                                                                                       | <i>Gallus gallus</i>                                 | Yes                            | Supplementary<br>Information 2 |
|            |    |     |      |                   | 吻仔魚 |        | C2A2       | Sanger (+)                                                                                                                       | <i>Pholis fangi</i><br><br><i>Dictyosoma burgeri</i> |                                | Supplementary<br>Information 2 |
|            | 28 | C2B | 每日貓罐 | 每日貓罐-鮪魚+蟹味絲<br>湯罐 | 鮪魚  | Taiwan | C2B1       | Sanger (+)                                                                                                                       | <i>Thunnus tonggol</i>                               | No                             | Supplementary<br>Information 2 |
|            |    |     |      |                   | 蟹味絲 |        |            |                                                                                                                                  | <i>Thunnus orientalis</i><br><i>Thunnus obesus</i>   |                                |                                |
|            |    |     |      |                   |     |        | C2B2       | Sanger (-)*                                                                                                                      |                                                      |                                |                                |
|            | 29 | C2C | 每日貓罐 | 每日貓罐-鮪魚+巴沙魚<br>湯罐 | 鮪魚  | Taiwan | C2C1       | Sanger (+)                                                                                                                       | <i>Thunnus tonggol</i>                               | No                             | Supplementary<br>Information 2 |
| 巴沙魚        |    |     |      |                   |     |        |            | <i>Thunnus orientalis</i><br><i>Thunnus obesus</i>                                                                               |                                                      |                                |                                |
|            |    |     |      |                   |     | C2C2   | Sanger (+) | <i>Pangasianodon hypophthalmus</i><br><br><i>Pangasius bocourti</i><br><i>Pangasius djambal</i><br><i>Pangasius sanitwongsei</i> |                                                      | Supplementary<br>Information 2 |                                |
|            |    |     |      |                   |     |        |            |                                                                                                                                  |                                                      |                                |                                |



|            |     |         |                   |                                    |                             |          |          |             |                              |                                      |                             |                             |
|------------|-----|---------|-------------------|------------------------------------|-----------------------------|----------|----------|-------------|------------------------------|--------------------------------------|-----------------------------|-----------------------------|
| 30         | C2D | 每日貓罐    | 每日貓罐-雞肉+柴魚湯罐      |                                    | 雞肉                          | Taiwan   | C2D1     | Sanger (+)  | <i>Gallus gallus</i>         | No                                   | Supplementary Information 2 |                             |
|            |     |         |                   |                                    | 柴魚                          |          | C2D2     | Sanger (-)* |                              |                                      |                             |                             |
| 2021.03.23 | 31  | C3A     | CANIDAE           | 無穀主食罐(鮭魚、鯖魚、鯛魚湯罐)                  | Salmon & whitefish in gravy | 鮭魚       | Thailand | C3A1        | Sanger (+)                   | <i>Oncorhynchus gorbuscha</i>        | No                          | Supplementary Information 2 |
|            |     |         |                   |                                    |                             | 鯛魚       |          | C3A2        | Sanger (+)                   | <i>Sparus aurata</i>                 |                             | Supplementary Information 2 |
|            |     |         |                   |                                    |                             | 鯖魚       |          | C3A3        | Sanger (+)                   | <i>Katsuwonus pelamis</i>            |                             | Supplementary Information 2 |
|            |     |         |                   |                                    |                             |          |          |             |                              | <i>Thunnus albacares<sup>a</sup></i> |                             |                             |
| 32         | C3B | CANIDAE | 無穀主食罐(沙丁魚、鯖魚湯罐)   | Chunky sardine & mackerel in broth | 沙丁魚                         | Thailand | C3B1     | Sanger (+)  | <i>Sardinella fijiensis</i>  | No                                   | Supplementary Information 2 |                             |
|            |     |         |                   |                                    | 魷魚                          |          |          |             | <i>Sardinella gibbosa</i>    |                                      |                             |                             |
|            |     |         |                   |                                    |                             |          |          |             | <i>Sardinella jussieu</i>    |                                      |                             |                             |
|            |     |         |                   |                                    |                             |          |          |             | <i>Sardinella fimbriata</i>  |                                      |                             |                             |
|            |     | C3B2    | Sanger (-)*       |                                    |                             |          |          |             |                              |                                      |                             |                             |
| 33         | C3C | Applaws | 愛普士全天然鮮食罐(鯖魚、雞胸肉) | Mackerel with chicken breast       | 鯖魚                          | Thailand | C3C1     | Sanger (+)  | <i>Scomber japonicus</i>     | No                                   | Supplementary Information 2 |                             |
|            |     |         |                   |                                    | 雞胸肉                         |          |          |             | <i>Scomber scombrus</i>      |                                      |                             |                             |
|            |     |         |                   |                                    |                             |          |          |             | <i>Scomber australasicus</i> |                                      |                             |                             |

|            |     |         |                       |                       |           |          |      |            |                                       |                       |                             |  |
|------------|-----|---------|-----------------------|-----------------------|-----------|----------|------|------------|---------------------------------------|-----------------------|-----------------------------|--|
|            |     |         |                       |                       |           |          |      |            |                                       | <i>Scomber colias</i> |                             |  |
|            |     |         |                       |                       |           |          | C3C2 | Sanger (+) | <i>Gallus gallus</i>                  |                       | Supplementary Information 2 |  |
| 34         | C3D | Applaws | 愛普士全天然鮮食罐<br>(鮪魚)     | Tuna fillet           | 鮪魚        | Thailand | C3D  | Sanger (+) | <i>Auxis rochei</i>                   | Yes                   | Supplementary Information 2 |  |
|            |     |         |                       |                       |           |          |      |            | <i>Auxis thazard</i>                  |                       |                             |  |
|            |     |         |                       |                       |           |          |      |            | <i>Euthymnus affinis</i> <sup>4</sup> |                       |                             |  |
| 35         | C3E | Applaws | 愛普士全天然鮮食罐<br>(鯖魚、沙丁魚) | Mackerel with sardine | 鯖魚<br>沙丁魚 | Thailand | C3E1 | Sanger (+) | <i>Scomber japonicus</i>              | No                    | Supplementary Information 2 |  |
|            |     |         |                       |                       |           |          |      |            | <i>Scomber scombrus</i>               |                       |                             |  |
|            |     |         |                       |                       |           |          |      |            | <i>Scomber australasicus</i>          |                       |                             |  |
|            |     |         |                       |                       |           |          |      |            | <i>Scomber colias</i>                 |                       |                             |  |
|            |     |         |                       |                       |           |          | C3E2 | Sanger (+) | <i>Scomber japonicus</i>              |                       | Supplementary Information 2 |  |
|            |     |         |                       |                       |           |          |      |            | <i>Scomber scombrus</i>               |                       |                             |  |
|            |     |         |                       |                       |           |          |      |            | <i>Scomber australasicus</i>          |                       |                             |  |
|            |     |         |                       |                       |           |          |      |            | <i>Scomber colias</i>                 |                       |                             |  |
| 2021.03.26 | 36  | C4A     | 鼎食貓罐<br>(新鮮鯖魚+丁香魚)    |                       | 鯖魚<br>丁香魚 | Taiwan   | C4A1 | Sanger (+) | <i>Thunnus tonggol</i>                | Yes                   | Supplementary Information 2 |  |
|            |     |         |                       |                       |           |          |      |            | <i>Thunnus orientalis</i>             |                       |                             |  |

|            |     |      |                   |                         |                      |          |          |             |                                 |                           |                             |    |
|------------|-----|------|-------------------|-------------------------|----------------------|----------|----------|-------------|---------------------------------|---------------------------|-----------------------------|----|
|            |     |      |                   |                         |                      |          |          |             | <i>Thunnus atlanticus</i>       |                           |                             |    |
|            |     |      |                   |                         |                      |          | C4A2     | Sanger (+)  | <i>Encrasicholina punctifer</i> |                           | Supplementary Information 2 |    |
| 37         | C4B | 鼎食貓罐 | 鼎食貓罐(旗魚)          |                         | 旗魚                   | Taiwan   | C4B      | Sanger (-)* |                                 |                           | Uncertain                   |    |
| 38         | C4C | 鼎食貓罐 | 鼎食貓罐(新鮮鯖魚+櫻花蝦)    |                         | 鯖魚                   | Taiwan   | C4C1     | Sanger (+)  | <i>Thunnus tonggol</i>          |                           | No                          |    |
|            |     |      |                   |                         | 櫻花蝦                  |          |          |             | <i>Thunnus orientalis</i>       |                           | Supplementary Information 2 |    |
|            |     |      |                   |                         |                      |          |          |             | <i>Thunnus atlanticus</i>       |                           |                             |    |
|            |     |      |                   |                         |                      |          | C4C2     | Sanger (+)  | <i>Thunnus tonggol</i>          |                           | Supplementary Information 2 |    |
|            |     |      |                   |                         |                      |          |          |             | <i>Thunnus orientalis</i>       |                           |                             |    |
|            |     |      |                   |                         |                      |          |          |             | <i>Thunnus atlanticus</i>       |                           |                             |    |
| 39         | C4D | 怪獸部落 | 無膠無穀鮮肉煲-鯖魚<br>丁湯罐 | Diced mackerel in broth | 鯖魚                   | Thailand | C4D      | Sanger (+)  | <i>Scomber japonicus</i>        |                           | No                          |    |
|            |     |      |                   |                         |                      |          |          |             | <i>Scomber scombrus</i>         |                           | Supplementary Information 2 |    |
|            |     |      |                   |                         |                      |          |          |             | <i>Scomber australasicus</i>    |                           |                             |    |
|            |     |      |                   |                         |                      |          |          |             | <i>Scomber colias</i>           |                           |                             |    |
| 2021.03.30 | 40  | C5A  | 怪獸部落              | 無膠無穀鮮肉煲-鯖魚<br>片湯罐       | Flaked tuna in broth | 鯖魚       | Thailand | C5A         | Sanger (+)                      | <i>Katsuwonus pelamis</i> |                             | No |
|            |     |      |                   |                         |                      |          |          |             |                                 |                           | Supplementary Information 2 |    |

|    |     |          |               |                                             |     |          |      |             |                                       |           |                             |
|----|-----|----------|---------------|---------------------------------------------|-----|----------|------|-------------|---------------------------------------|-----------|-----------------------------|
|    |     |          |               |                                             |     |          |      |             | <i>Thunnus albacares</i> <sup>a</sup> |           |                             |
| 41 | C5B | 怪獸部落     | 無膠無穀鮮肉煲-鯉魚塊湯罐 | Chopped skipjack in broth                   | 鯉魚  | Thailand | C5B  | Sanger (+)  | <i>Katsuwonus pelamis</i>             | No        | Supplementary Information 2 |
|    |     |          |               |                                             |     |          |      |             | <i>Thunnus albacares</i> <sup>a</sup> |           |                             |
| 42 | C5C | 怪獸部落     | 無膠無穀先煲-嫩雞丁湯罐  | Diced chicken in broth                      | 雞肉  | Thailand | C5C  | Sanger (+)  | <i>Gallus gallus</i>                  | No        | Supplementary Information 2 |
| 43 | C5G | Tiki Cat | 夏日 5 號        | Wild salmon recipe in salmon consommé       | 鮭魚  | Thailand | C5G  | Sanger (+)  | <i>Oncorhynchus gorbuscha</i>         | No        | Supplementary Information 2 |
| 44 | C5H | Tiki Cat | 夏日 6 號        | Ahi tuna & mackerel recipe in tuna consommé | 鮪魚  | Thailand | C5H1 | Sanger (-)* |                                       | Uncertain |                             |
|    |     |          |               |                                             | 鯖魚  |          | C5H2 | Sanger (-)* |                                       |           |                             |
| 45 | C5I | Tiki Cat | 夏日 4 號        | Sardine cutlets recipe in lobster consommé  | 沙丁魚 | Thailand | C5I  | Sanger (+)  | <i>Sardinella fijiensis</i>           | No        | Supplementary Information 2 |
|    |     |          |               |                                             |     |          |      |             | <i>Sardinella gibbosa</i>             |           |                             |
|    |     |          |               |                                             |     |          |      |             | <i>Sardinella jussieu</i>             |           |                             |
|    |     |          |               |                                             |     |          |      |             | <i>Sardinella fimbriata</i>           |           |                             |

|            |     |     |                       |                       |        |          |             |             |                                  |                                |                                |  |
|------------|-----|-----|-----------------------|-----------------------|--------|----------|-------------|-------------|----------------------------------|--------------------------------|--------------------------------|--|
| 2021.03.31 | 46  | C6A | 海之味                   | 海之味貓咪主食罐 ES5<br>旗魚+雞肉 | 旗魚     | Thailand | C6A1        | Sanger (+)  | <i>Istiophorus albicans</i>      | No                             | Supplementary<br>Information 2 |  |
|            |     |     |                       |                       | 雞肉     |          |             |             |                                  | <i>Istiophorus platypterus</i> |                                |  |
|            |     |     |                       |                       | 丁香魚    |          |             |             |                                  | <i>Istiompax indica</i>        |                                |  |
|            |     |     |                       |                       | 鮮蝦仁    |          |             |             |                                  | <i>Makaira nigricans</i>       |                                |  |
|            |     |     |                       |                       | 干貝     |          |             |             |                                  | <i>Makaira mazara</i>          |                                |  |
|            |     |     |                       |                       | 吻仔魚    |          | C6A2        | Sanger (+)  | <i>Gallus gallus</i>             |                                | Supplementary<br>Information 2 |  |
|            |     |     |                       |                       |        |          | C6A3        | Sanger (+)  | <i>Encrasicholina punctifer</i>  |                                | Supplementary<br>Information 2 |  |
|            |     |     |                       |                       |        |          | C6A4        | Sanger (-)* |                                  |                                |                                |  |
|            |     |     |                       |                       |        |          | C6A5        | Sanger (-)* |                                  |                                |                                |  |
|            |     |     |                       |                       |        |          | C6A6        | Sanger (+)  | <i>Encrasicholina heteroloba</i> |                                | Supplementary<br>Information 2 |  |
| 47         | C6B | 海之味 | 海之味貓咪主食罐 ES4<br>鮪魚+雞肉 | 鮪魚                    | Taiwan | C6B1     | Sanger (-)* |             | Uncertain                        |                                |                                |  |
|            |     |     |                       | 雞肉                    |        | C6B2     | Sanger (-)* |             |                                  |                                |                                |  |
|            |     |     |                       | 丁香魚                   |        | C6B3     | Sanger (-)* |             |                                  |                                |                                |  |
|            |     |     |                       | 鮮蝦仁                   |        | C6B4     | Sanger (-)* |             |                                  |                                |                                |  |
|            |     |     |                       | 干貝                    |        | C6B5     | Sanger (-)* |             |                                  |                                |                                |  |
|            |     |     |                       | 吻仔魚                   |        | C6B6     | Sanger (-)* |             |                                  |                                |                                |  |
|            |     |     |                       |                       |        |          |             |             |                                  |                                |                                |  |

|            |    |     |          |                                   |     |          |      |             |                                           |                                |                                |
|------------|----|-----|----------|-----------------------------------|-----|----------|------|-------------|-------------------------------------------|--------------------------------|--------------------------------|
|            | 48 | C6C | DELIZIOS | DELIZIOS 饕客貓湯罐<br>鯉魚佐頂級肉湯         | 鯉魚  | Thailand | C6C  | Sanger (-)* |                                           | Uncertain                      |                                |
|            | 49 | C6D | DELIZIOS | DELIZIOS 饕客貓湯罐<br>鯉魚佐吻仔魚          | 鯉魚  | Thailand | C6D1 | Sanger (-)* |                                           | No                             |                                |
|            |    |     |          |                                   | 吻仔魚 |          | C6D2 | Sanger (+)  | <i>Encrasicholina heteroloba</i>          | Supplementary<br>Information 2 |                                |
|            | 50 | C6E | DELIZIOS | DELIZIOS 饕客貓湯罐<br>鯉魚塊+雕魚蝦肉佐肉<br>湯 | 鯉魚  | Thailand | C6E1 | Sanger (-)* |                                           | Yes                            |                                |
|            |    |     |          |                                   | 鯛魚  |          | C6E2 | Sanger (+)  | <i>Lates calcarifer</i>                   | Supplementary<br>Information 2 |                                |
|            |    |     |          |                                   | 蝦   |          |      |             | <i>Psammoperca waigiensis<sup>f</sup></i> |                                |                                |
|            |    |     |          |                                   |     |          | C6E3 | Sanger (-)* |                                           |                                |                                |
| 2021.04.14 | 51 | D3A | 好味小姐     | 1+1 貓鮮食主食罐(白醬<br>嫩雞)              | 雞肉  | Taiwan   | D3A  | Sanger (+)  | <i>Gallus gallus</i>                      | No                             | Supplementary<br>Information 2 |
|            | 52 | D3B | 好味小姐     | 1+1 貓鮮食主食罐(白醬<br>嫩雞)              | 牛肉  | Taiwan   | D3B1 | Sanger (+)  | <i>Bos taurus</i>                         | No                             | Supplementary<br>Information 2 |
|            |    |     |          |                                   | 雞肉  |          | D3B2 | Sanger (+)  | <i>Gallus gallus</i>                      | Supplementary<br>Information 2 |                                |

|            |     |         |                       |      |          |      |             |                                                                                      |     |                             |
|------------|-----|---------|-----------------------|------|----------|------|-------------|--------------------------------------------------------------------------------------|-----|-----------------------------|
| 53         | D3C | 好味小姐    | 1+1 貓鮮食主食罐(白醬嫩雞)      | 鯛魚   | Taiwan   | D3C1 | Sanger (+)  | <i>Tilapia nilotica</i>                                                              | Yes | Supplementary Information 2 |
|            |     |         |                       | 雞肉   |          | D3C2 | Sanger (+)  | <i>Gallus gallus</i>                                                                 |     | Supplementary Information 2 |
|            |     |         |                       | 鮭魚   |          | D3C3 | Sanger (+)  | <i>Gallus gallus</i>                                                                 |     | Supplementary Information 2 |
| 2021.04.23 | 54  | YAMI 亞米 | YAMI 雞湯大餐 鮮雞, 雞肝, 青花魚 | 青花魚  | Thailand | D1A1 | Sanger (+)  | <i>Gallus gallus</i>                                                                 | No  | Supplementary Information 2 |
|            |     |         |                       | 雞肉   |          | D1A2 | Sanger (-)* |                                                                                      |     |                             |
| 55         | D1B | YAMI 亞米 | 鮮鮪, 雞肉白金大餐            | 鮪魚白肉 | Thailand | D1B1 | Sanger (+)  | <i>Auxis thazard</i><br><i>Auxis rochei</i><br><i>Euthynnus affinis</i> <sup>d</sup> | Yes | Supplementary Information 2 |
|            |     |         |                       | 雞肉   |          | D1B2 | Sanger (+)  | <i>Gallus gallus</i>                                                                 |     | Supplementary Information 2 |
| 56         | D1C | YAMI 亞米 | 鮮鮪, 青花魚, 蟹柳白金大餐       | 鮪魚白肉 | Thailand | D1C1 | Sanger (+)  | <i>Auxis thazard</i>                                                                 | Yes | Supplementary Information 2 |
|            |     |         |                       | 青花魚  |          |      |             | <i>Auxis rochei</i>                                                                  |     |                             |
|            |     |         |                       | 蟹柳   |          |      |             | <i>Euthynnus affinis</i> <sup>d</sup>                                                |     |                             |

|    |     |         |                        |    |          |      |             |                                      |    |                             |
|----|-----|---------|------------------------|----|----------|------|-------------|--------------------------------------|----|-----------------------------|
|    |     |         |                        |    |          | D1C2 | Sanger (+)  | <i>Scomber japonicus</i>             |    | Supplementary Information 2 |
|    |     |         |                        |    |          |      |             | <i>Scomber scombrus</i>              |    |                             |
|    |     |         |                        |    |          |      |             | <i>Scomber australasicus</i>         |    |                             |
|    |     |         |                        |    |          |      |             | <i>Scomber colias</i>                |    |                             |
|    |     |         |                        |    |          | D1C3 | Sanger (-)* |                                      |    |                             |
| 57 | D1D | YAMI 亞米 | YAMI 雞湯大餐 鮮雞.<br>牛肉,鮭魚 | 雞肉 | Thailand | D1D1 | Sanger (+)  | <i>Gallus gallus</i>                 | No | Supplementary Information 2 |
|    |     |         |                        | 鮭魚 |          | D1D2 | Sanger (+)  | <i>Oncorhynchus gorbuscha</i>        |    | Supplementary Information 2 |
|    |     |         |                        | 牛肉 |          | D1D3 | Sanger (+)  | <i>Bos taurus</i>                    |    | Supplementary Information 2 |
| 58 | D2A | TRIL GY | 奇境 無穀貓罐 野生鯖<br>魚嫩雞湯    | 鯖魚 | Thailand | D2A  | Sanger (+)  | <i>Scomber japonicus</i>             | No | Supplementary Information 2 |
|    |     |         |                        |    |          |      |             | <i>Scomber scombrus</i>              |    |                             |
|    |     |         |                        |    |          |      |             | <i>Scomber australasicus</i>         |    |                             |
|    |     |         |                        |    |          |      |             | <i>Scomber colias</i>                |    |                             |
| 59 | D2B | TRIL GY | 奇境 無穀貓罐 野生鯖<br>魚嫩雞湯    | 鯖魚 | Thailand | D2B  | Sanger (+)  | <i>Katsuwonus pelamis</i>            | No | Supplementary Information 2 |
|    |     |         |                        |    |          |      |             | <i>Thunnus albacares<sup>a</sup></i> |    |                             |



|            |    |     |      |                    |     |          |      |             |                                      |    |                                |
|------------|----|-----|------|--------------------|-----|----------|------|-------------|--------------------------------------|----|--------------------------------|
| 2021.04.28 | 60 | D2C | OKAT | 美喵人生 無穀化毛餐         | 鮪魚  | Thailand | D2C1 | Sanger (+)  | <i>Katsuwonus pelamis</i>            | No | Supplementary<br>Information 2 |
|            |    |     |      |                    |     |          |      |             | <i>Thunnus albacares<sup>a</sup></i> |    |                                |
|            |    |     |      |                    | 沙丁魚 |          | D2C2 | Sanger (+)  | <i>Sardinella fijiensis</i>          |    | Supplementary<br>Information 2 |
|            |    |     |      |                    |     |          |      |             | <i>Sardinella gibbosa</i>            |    |                                |
|            |    |     |      |                    |     |          |      |             | <i>Sardinella jussieu</i>            |    |                                |
|            |    |     |      |                    |     |          |      |             | <i>Sardinella fimbriata</i>          |    |                                |
|            | 61 | D2D | OKAT | 美喵人生 無穀超機能<br>好鮮肉罐 | 鯷魚  | Thailand | D2D1 | Sanger (-)* |                                      | No |                                |
|            |    |     |      |                    | 鮪魚  |          |      |             | D2D2                                 |    |                                |
|            |    |     |      |                    |     |          |      |             | <i>Thunnus albacares<sup>a</sup></i> |    | Supplementary<br>Information 2 |
|            | 62 | D2E | OKAT | 美喵人生 無穀超機能<br>好濃肉罐 | 鯖魚  | Thailand | D2E1 | Sanger (-)* |                                      | No |                                |
|            |    |     |      |                    | 蝦   |          |      |             | D2E2                                 |    |                                |
|            |    |     |      |                    |     |          |      |             | <i>Metapenaeopsis palmensis</i>      |    | Supplementary<br>Information 2 |
|            |    |     |      |                    |     |          |      |             | <i>Metapenaeopsis stridulans</i>     |    |                                |

|            |     |      |                           |                       |        |          |                                                                    |                                 |           |                                |
|------------|-----|------|---------------------------|-----------------------|--------|----------|--------------------------------------------------------------------|---------------------------------|-----------|--------------------------------|
| 63         | D2F | Rico | 芮可-貓用副食鮮湯罐 4<br>號(鮪雞+吻仔魚) | 鮪魚                    | Taiwan | D2F1     | Sanger (-)*                                                        | No                              |           |                                |
|            |     |      |                           | 雞肉                    |        | D2F2     | Sanger (+) <i>Gallus gallus</i>                                    | Supplementary<br>Information 2  |           |                                |
|            |     |      |                           | 吻仔魚                   |        | D2F3     | Sanger (+) <i>Encrasicholina heteroloba</i>                        | Supplementary<br>Information 2  |           |                                |
| 64         | D2G | Rico | 芮可-貓用副食鮮湯罐 2<br>號(鮪雞+鯉魚)  | 鯉魚                    | Taiwan | D2G1     | Sanger (-)*                                                        | No                              |           |                                |
|            |     |      |                           | 雞肉                    |        | D2G2     | Sanger (+) <i>Gallus gallus</i>                                    | Supplementary<br>Information 2  |           |                                |
|            |     |      |                           | 鮪魚                    |        | D2G3     | Sanger (+) <i>Thunnus tonggol</i><br><br><i>Thunnus orientalis</i> | Supplementary<br>Information 2  |           |                                |
| 2021.05.05 | 65  | E1A  | Signature7                | 新寵七味賞 星期四 白<br>身鮪魚+南瓜 | 白身鮪魚   | Thailand | E1A                                                                | Sanger (-)*                     | Uncertain |                                |
|            | 66  | E1B  | Signature7                | 新寵七味賞 星期四 鯖<br>魚+胡蘿蔔  | 鯖魚     | Thailand | E1B                                                                | Sanger (-)*                     | Uncertain |                                |
|            | 67  | E1C  | Lungevity                 | 永恆無穀主食罐               | 雞肉     |          | E1C1                                                               | Sanger (+) <i>Gallus gallus</i> | No        | Supplementary<br>Information 2 |

|            |     |       |                 |                             |          |        |                                            |                                        |                                |                                |
|------------|-----|-------|-----------------|-----------------------------|----------|--------|--------------------------------------------|----------------------------------------|--------------------------------|--------------------------------|
|            |     |       |                 | 白鯷魚                         | Thailand | E1C2   | Sanger (-)*                                |                                        |                                |                                |
| 68         | E1D | 湯貓道   | 湯貓道之無膠營養上湯<br>罐 | 白身鮪魚                        | Taiwan   | E1D1   | Sanger (-)*                                | No                                     |                                |                                |
|            |     |       |                 | 雞肉                          |          | E1D2   | Sanger (+) <i>Gallus gallus</i>            |                                        | Supplementary<br>Information 2 |                                |
|            |     |       |                 | 吻仔魚                         |          | E1D3   | Sanger (-)*                                |                                        |                                |                                |
| 69         | E1E | AIXIA | 樂妙喵 3 號-鮪.吻仔    | 鮪魚                          | Japan    | E1E1   | Sanger (+) <i>Thunnus tonggol</i>          | No                                     | Supplementary<br>Information 2 |                                |
|            |     |       |                 |                             |          |        | <i>Thunnus orientalis</i>                  |                                        |                                |                                |
|            |     |       |                 | 吻仔魚                         |          | E1E2   | Sanger (+) <i>Encrasicholina punctifer</i> |                                        | Supplementary<br>Information 2 |                                |
| 70         | E1F | AIXIA | 樂妙喵 4 號-鮪.柴魚    | 鮪魚                          | Japan    | E1F1   | Sanger (+) <i>Thunnus tonggol</i>          | No                                     | Supplementary<br>Information 2 |                                |
|            |     |       |                 |                             |          |        | <i>Thunnus orientalis</i>                  |                                        |                                |                                |
|            |     |       |                 | 柴魚                          |          | E1F2   | Sanger (-)*                                |                                        |                                |                                |
| 2021.05.10 | 71  | E2A   | 厚肉肉             | T.N.A 悠遊厚肉肉主食<br>罐.海味旗魚拚海瓜子 | 旗魚       | Taiwan | E2A                                        | Sanger (+) <i>Istiophorus albicans</i> | No                             | Supplementary<br>Information 2 |
|            |     |       |                 |                             |          |        | <i>Istiophorus platypterus</i>             |                                        |                                |                                |
|            |     |       |                 |                             |          |        | <i>Istiompax indica</i>                    |                                        |                                |                                |

|    |     |       |                             |     |        |      |             |                                 |    |                                |
|----|-----|-------|-----------------------------|-----|--------|------|-------------|---------------------------------|----|--------------------------------|
|    |     |       |                             |     |        |      |             | <i>Makaira nigricans</i>        |    |                                |
|    |     |       |                             |     |        |      |             | <i>Makaira mazara</i>           |    |                                |
| 72 | E2B | 厚肉肉   | T.N.A 悠遊厚肉肉主食<br>罐-至尊鯉魚拚吻仔魚 | 鯉魚  | Taiwan | E2B1 | Sanger (-)* |                                 | No |                                |
|    |     |       |                             | 吻仔魚 |        | E2B2 | Sanger (+)  | <i>Encrasicholina punctifer</i> |    | Supplementary<br>Information 2 |
| 73 | E2C | 厚肉肉   | T.N.A 悠遊厚肉肉主食<br>罐-一品鮪魚拚鮭魚  | 鮪魚  | Taiwan | E2C  | Sanger (+)  | <i>Thunnus tonggol</i>          | No | Supplementary<br>Information 2 |
|    |     |       |                             |     |        |      |             | <i>Thunnus orientalis</i>       |    |                                |
| 74 | E2D | AIXIA | 燒津 43 號-鮪.雞.鮭               | 鮪魚  | Japan  | E2D1 | Sanger (+)  | <i>Thunnus tonggol</i>          | No | Supplementary<br>Information 2 |
|    |     |       |                             |     |        |      |             | <i>Thunnus orientalis</i>       |    |                                |
|    |     |       |                             | 雞肉  |        | E2D2 | Sanger (+)  | <i>Gallus gallus</i>            |    | Supplementary<br>Information 2 |
|    |     |       |                             | 鮭魚  |        | E2D3 | Sanger (+)  | <i>Oncorhynchus nerka</i>       |    | Supplementary<br>Information 2 |
| 75 | E2E | 愛喜雅   | 燒津 42 號-鮪.雞.吻               | 鮪魚  | Japan  | E2E1 | Sanger (+)  | <i>Thunnus tonggol</i>          | No | Supplementary<br>Information 2 |
|    |     |       |                             |     |        |      |             | <i>Thunnus orientalis</i>       |    |                                |
|    |     |       |                             | 雞肉  |        | E2E2 | Sanger (-)* |                                 |    |                                |

|            |    |     |      |                            |        |        |      |             |                                                     |    |                                |
|------------|----|-----|------|----------------------------|--------|--------|------|-------------|-----------------------------------------------------|----|--------------------------------|
|            |    |     |      |                            | 狗仔魚    |        | E2E3 | Sanger (+)  | <i>Encrasicholina heteroloba</i>                    |    | Supplementary<br>Information 2 |
|            | 76 | C5F | 小怪獸  | 怪獸部落 2 種肉無膠主<br>食罐-貓用鰵肉雞肉餐 | 雞肉     | Taiwan | C5F1 | Sanger (-)* |                                                     | No |                                |
|            |    |     |      |                            | 鰵肉     |        | C5F2 | Sanger (+)  | <i>Gallus gallus</i>                                |    | Supplementary<br>Information 2 |
|            |    |     |      |                            | 鰵魚     |        |      |             |                                                     |    |                                |
| 2021.05.14 | 77 | E3A | CIAO | 多樂米濃湯罐(雞肉+鰵<br>魚+狗仔魚)      | 雞肉     | Japan  | E3A1 | Sanger (+)  | <i>Gallus gallus</i>                                | No | Supplementary<br>Information 2 |
|            |    |     |      |                            | 鰵魚     |        | E3A2 | Sanger (+)  | <i>Gallus gallus</i>                                |    | Supplementary<br>Information 2 |
|            |    |     |      |                            | 狗仔魚    |        | E3A3 | Sanger (-)* |                                                     |    |                                |
|            | 78 | E3B | CIAO | 多樂米濃湯罐(鮪魚+雞<br>肉+柴魚片)      | 鮪魚(鰹魚) | Japan  | E3B1 | Sanger (+)  | <i>Gallus gallus</i>                                | No | Supplementary<br>Information 2 |
|            |    |     |      |                            | 雞肉     |        | E3B2 | Sanger (+)  | <i>Gallus gallus</i>                                |    | Supplementary<br>Information 2 |
|            |    |     |      |                            | 柴魚片    |        | E3B3 | Sanger (+)  | <i>Thunnus obesus</i><br><br><i>Thunnus tonggol</i> |    | Supplementary<br>Information 2 |

|    |     |             |                            |               |     |        |      |             |                                  |    |                                |
|----|-----|-------------|----------------------------|---------------|-----|--------|------|-------------|----------------------------------|----|--------------------------------|
| 79 | E3C | N&D         | N&D 挑購成貓天然海<br>洋主食罐-鮪魚蝦肉   | Tuna & shrimp | 鮪魚  | Serbia | E3C1 | Sanger (+)  | <i>Thunnus tonggol</i>           | No | Supplementary<br>Information 2 |
|    |     |             |                            |               |     |        |      |             |                                  |    |                                |
|    |     |             |                            |               | 蝦肉  |        | E3C2 | Sanger (-)* |                                  |    |                                |
| 80 | E3D | Hagoromo    | 有魚魚真幸福貓罐頭-<br>吻仔魚添加        |               | 鮪魚  | Japan  | E3D1 | Sanger (+)  | <i>Thunnus tonggol</i>           | No | Supplementary<br>Information 2 |
|    |     |             |                            |               |     |        |      |             |                                  |    |                                |
|    |     |             |                            |               | 吻仔魚 |        | E3D2 | Sanger (+)  | <i>Encrasicholina heteroloba</i> |    | Supplementary<br>Information 2 |
| 81 | E3E | Cat's Voice | 日本 VOICE 五星頂級<br>貓罐 鮪魚+魚子醬 |               | 鮪魚  | Japan  | E3E1 | Sanger (+)  | <i>Thunnus tonggol</i>           | No | Supplementary<br>Information 2 |
|    |     |             |                            |               |     |        |      |             |                                  |    |                                |
|    |     |             |                            |               | 魚子醬 |        | E3E2 | Sanger (+)  | <i>Acipenser fulvescens</i>      |    | Supplementary<br>Information 2 |
|    |     |             |                            |               |     |        |      |             | <i>Acipenser gueldenstaedtii</i> |    |                                |
|    |     |             |                            |               |     |        |      |             | <i>Huso dauricus</i>             |    |                                |
|    |     |             |                            |               |     |        |      |             | <i>Acipenser brevirostrum</i>    |    |                                |
|    |     |             |                            |               |     |        |      |             | <i>Acipenser mikadoi</i>         |    |                                |
|    |     |             |                            |               |     |        |      |             | <i>Acipenser medirostris</i>     |    |                                |
|    |     |             |                            |               |     |        |      |             | <i>Acipenser ruthenus</i>        |    |                                |
|    |     |             |                            |               |     |        |      |             | <i>Acipenser baerii</i>          |    |                                |

|            |    |     |        |                          |                          |     |          |      |             |                                      |    |                                |
|------------|----|-----|--------|--------------------------|--------------------------|-----|----------|------|-------------|--------------------------------------|----|--------------------------------|
|            |    |     |        |                          |                          |     |          |      |             | <i>Acipenser naccarii</i>            |    |                                |
|            |    |     |        |                          |                          |     |          |      |             | <i>Acipenser baerii baicalensis</i>  |    |                                |
| 2021.05.31 | 82 | E4A | Sheba  | SHEBA 金罐 白身鮪魚<br>及鰹魚(湯汁) | Tuna with bream in jelly | 鮪魚  | Thailand | E4A1 | Sanger (+)  | <i>Thunnus obesus</i>                | No | Supplementary<br>Information 2 |
|            |    |     |        |                          |                          |     |          |      |             | <i>Thunnus tonggol</i>               |    | Supplementary<br>Information 2 |
|            |    |     |        |                          |                          | 鯛魚  |          | E4A2 | Sanger (+)  | <i>Priacanthus macracanthus</i>      |    | Supplementary<br>Information 2 |
|            | 83 | E4B | Sheba  | SHEBA 金罐 白身鮪魚<br>及魴魚(魚凍) | Tuna with bream in jelly | 鮪魚  | Thailand | E4B1 | Sanger (+)  | <i>Thunnus tonggol</i>               | No | Supplementary<br>Information 2 |
|            |    |     |        |                          |                          |     |          |      |             | <i>Thunnus orientalis</i>            |    | Supplementary<br>Information 2 |
|            |    |     |        |                          |                          | 白身魚 |          | E4B2 | Sanger (+)  | <i>Nemipterus zysron</i>             |    | Supplementary<br>Information 2 |
|            |    |     |        |                          |                          | 魴魚  |          | E4B3 | Sanger (-)* |                                      |    |                                |
|            | 84 | E4C | 17MEOW | 17 喵喵罐-鮪魚+鯛魚             | Tuna + Seabream          | 鮪魚  | Vietnam  | E4C1 | Sanger (+)  | <i>Katsuwonus pelamis</i>            | No | Supplementary<br>Information 2 |
|            |    |     |        |                          |                          |     |          |      |             | <i>Thunnus albacares<sup>a</sup></i> |    |                                |
|            |    |     |        |                          |                          | 鯛魚  |          | E4C2 | Sanger (-)* |                                      |    |                                |
|            | 85 | E4D | 汪喵星球   | 貓咪點心罐 白身鮪魚<br>綠胎貝        |                          | 鮪魚  | Thailand | E4D1 | Sanger (+)  | <i>Katsuwonus pelamis</i>            | No | Supplementary<br>Information 2 |

|            |     |       |                        |                        |          |      |             |                                  |                                       |                             |  |
|------------|-----|-------|------------------------|------------------------|----------|------|-------------|----------------------------------|---------------------------------------|-----------------------------|--|
|            |     |       |                        |                        |          |      |             |                                  | <i>Thunnus albacares</i> <sup>a</sup> |                             |  |
|            |     |       |                        |                        | 綠胎貝      | E4D2 | Sanger (+)  | <i>Thunnus obesus</i>            |                                       | Supplementary Information 2 |  |
|            |     |       |                        |                        |          |      |             |                                  | <i>Thunnus tonggol</i>                |                             |  |
| 86         | E4E | 汪喵星球  | 貓咪點心罐 鯉魚蛤蠣<br>小雙拼      | 鯉魚                     | Thailand | E4E1 | Sanger (+)  | <i>Katsuwonus pelamis</i>        | Yes                                   | Supplementary Information 2 |  |
|            |     |       |                        |                        |          |      |             |                                  | <i>Thunnus albacares</i> <sup>a</sup> |                             |  |
|            |     |       |                        | 蛤蠣                     |          | E4E2 | Sanger (+)  | <i>Thunnus obesus</i>            |                                       | Supplementary Information 2 |  |
|            |     |       |                        |                        |          |      |             |                                  | <i>Thunnus tonggol</i>                |                             |  |
| 87         | F1E | 靖禾風貓食 | 靖禾風貓食特級米罐<br>(鮪魚+米+鮭魚) | 鮪魚                     | Thailand | F1E1 | Sanger (+)  | <i>Katsuwonus pelamis</i>        | No                                    | Supplementary Information 2 |  |
|            |     |       |                        | 鮭魚                     |          | F1E2 | Sanger (-)* |                                  |                                       |                             |  |
|            |     |       |                        |                        |          |      |             |                                  | <i>Thunnus albacares</i> <sup>a</sup> |                             |  |
| 2021.06.25 | 88  | F4A   | 邦比-貓餐罐<br>+吻仔魚         | Tuna & shirasu<br>白身鮪魚 | Thailand | F4A1 | Sanger (+)  | <i>Katsuwonus pelamis</i>        | No                                    | Supplementary Information 2 |  |
|            |     |       |                        |                        |          |      |             |                                  | <i>Thunnus albacares</i> <sup>a</sup> |                             |  |
|            |     |       |                        | 吻仔魚                    |          | F4A2 | Sanger (+)  | <i>Encrasicholina heteroloba</i> |                                       | Supplementary Information 2 |  |



|    |     |                |                                   |                            |     |         |      |             |                                 |           |                                |
|----|-----|----------------|-----------------------------------|----------------------------|-----|---------|------|-------------|---------------------------------|-----------|--------------------------------|
| 89 | F4B | 藏鮮             | 藏鮮營養貓餐罐-鮪魚+<br>鮭魚                 | Tuna & salmon              | 鮪魚  | Taiwan  | F4B1 | Sanger (-)* |                                 | Uncertain |                                |
|    |     |                |                                   |                            | 鮭魚  |         | F4B2 | Sanger (-)* |                                 |           |                                |
| 90 | F4C | NatureKE       | 紐崔克/貓罐 鮪魚+吻<br>仔魚(凍罐)             | Tuna & shirasu             | 鮪魚  | Taiwan  | F4C1 | Sanger (+)  | <i>Thunnus tonggol</i>          | No        | Supplementary<br>Information 2 |
|    |     |                |                                   |                            |     |         |      |             | <i>Thunnus atlanticus</i>       |           |                                |
|    |     |                |                                   |                            |     |         |      |             | <i>Thunnus alalunga</i>         |           |                                |
|    |     |                |                                   |                            |     |         |      |             | <i>Thunnus albacares</i>        |           |                                |
|    |     |                |                                   |                            | 吻仔魚 |         | F4C2 | Sanger (+)  | <i>Encrasicholina punctifer</i> |           | Supplementary<br>Information 2 |
| 91 | F4D | CATs happy day | 幸福時光-貓營養主食 2<br>號罐(雞肉+鮪魚+巴沙<br>魚) | Chicken & tuna & bassafish | 雞肉  | Vietnam | F4D1 | Sanger (+)  | <i>Gallus gallus</i>            | No        | Supplementary<br>Information 2 |
|    |     |                |                                   |                            | 鮪魚  |         | F4D2 | Sanger (+)  | <i>Thunnus tonggol</i>          |           | Supplementary<br>Information 2 |
|    |     |                |                                   |                            |     |         |      |             | <i>Thunnus atlanticus</i>       |           |                                |
|    |     |                |                                   |                            |     |         |      |             | <i>Thunnus alalunga</i>         |           |                                |
|    |     |                |                                   |                            |     |         |      |             | <i>Thunnus albacares</i>        |           |                                |
|    |     |                |                                   |                            |     |         |      |             | <i>Thunnus maccoyii</i>         |           |                                |

|            |    |     |      |             |                     |     |          |            |                                    |                                                                                                            |                             |                             |
|------------|----|-----|------|-------------|---------------------|-----|----------|------------|------------------------------------|------------------------------------------------------------------------------------------------------------|-----------------------------|-----------------------------|
|            |    |     |      |             |                     | 巴沙魚 | F4D3     | Sanger (+) | <i>Pangasianodon hypophthalmus</i> |                                                                                                            | Supplementary Information 2 |                             |
| 2021.07.05 | 92 | F5A | 義士大廚 | 鮪魚鮮嫩罐-鮪魚吻仔魚 |                     | 鮪魚  | Thailand | F5A1       | Sanger (+)                         | <i>Auxis thazard</i><br><i>Auxis rochei</i><br><i>Euthynnus affinis</i> <sup>d</sup>                       | Yes                         | Supplementary Information 2 |
|            |    |     |      |             |                     | 吻仔魚 |          | F5A2       | Sanger (+)                         | <i>Sardinella fijiensis</i><br><i>Sardinella jussieu</i><br><i>Sardinella fimbriata</i>                    |                             | Supplementary Information 2 |
|            | 93 | F5B | 日清   | 日清極品貓罐      | Skipjack & salmon   | 鯷魚  | Thailand | F5B1       | Sanger (+)                         | <i>Katsuwonus pelamis</i><br><i>Thunnus albacares</i> <sup>a</sup>                                         | No                          | Supplementary Information 2 |
|            |    |     |      |             |                     | 鮭魚  |          | F5B2       | Sanger (+)                         | <i>Oncorhynchus nerka</i> (23)                                                                             |                             | Supplementary Information 2 |
|            | 94 | F5C | 日清   | 日清極品貓罐      | Yellowfin & shirasu | 鮪魚  | Thailand | F5C1       | Sanger (+)                         | <i>Thunnus tonggol</i><br><i>Thunnus atlanticus</i><br><i>Thunnus alalunga</i><br><i>Thunnus albacares</i> | No                          | Supplementary Information 2 |



|            |     |     |       |                        |     |          |      |             |                                                                        |    |                                |
|------------|-----|-----|-------|------------------------|-----|----------|------|-------------|------------------------------------------------------------------------|----|--------------------------------|
|            | 98  | F6B | AIXIA | 黑金罐主食 2 號鯉. 鮪.<br>鮪    | 鯉魚  | Korea    | F6B1 | Sanger (+)  | <i>Katsuwonus pelamis</i><br><br><i>Thunnus albacares</i> <sup>a</sup> | No | Supplementary<br>Information 2 |
|            |     |     |       |                        | 鮪魚  |          | F6B2 | Sanger (+)  | <i>Katsuwonus pelamis</i><br><br><i>Thunnus albacares</i> <sup>a</sup> |    | Supplementary<br>Information 2 |
|            |     |     |       |                        | 吻仔魚 |          | F6B3 | Sanger (+)  | <i>Katsuwonus pelamis</i><br><br><i>Thunnus albacares</i> <sup>a</sup> |    | Supplementary<br>Information 2 |
| 2021.07.15 | 99  | G1A | 偉嘉    | 偉嘉貓食溼糧 海洋大<br>餐        | 鮪魚  | Thailand | G1A1 | Sanger (+)  | <i>Katsuwonus pelamis</i><br><br><i>Thunnus albacares</i> <sup>a</sup> | No | Supplementary<br>Information 2 |
|            |     |     |       |                        | 沙丁魚 |          | G1A2 | Sanger (+)  | <i>Katsuwonus pelamis</i><br><br><i>Thunnus albacares</i> <sup>a</sup> |    | Supplementary<br>Information 2 |
|            |     |     |       |                        | 鯖魚  |          | G1A3 | Sanger (-)* |                                                                        |    |                                |
| 2021.09.13 | 100 | I1A | CIAO  | CIAO 旨定罐 雞肉+烤<br>鯉魚 貓用 | 雞肉  | Japan    | I1A1 | Sanger (+)  | <i>Gallus gallus</i>                                                   | No | Supplementary<br>Information 2 |
|            |     |     |       |                        | 鯉魚  |          | I1A2 | Sanger (+)  | <i>Katsuwonus pelamis</i><br><br><i>Thunnus albacares</i> <sup>a</sup> |    | Supplementary<br>Information 2 |

|            |     |     |               |             |                       |     |          |      |             |                                       |           |                             |
|------------|-----|-----|---------------|-------------|-----------------------|-----|----------|------|-------------|---------------------------------------|-----------|-----------------------------|
|            | 101 | I1B | OASY          | 鮪魚佐魷魚鮮食     | Tuna with squid       | 鮪魚  | Thailand | I1B1 | Sanger (+)  | <i>Katsuwonus pelamis</i>             | No        | Supplementary Information 2 |
|            |     |     |               |             |                       | 魷魚  |          | I1B2 | Sanger (-)* | <i>Thunnus albacares</i> <sup>a</sup> |           |                             |
|            | 102 | I1C | 快樂尾           | 貓肯罐 護心鮭魚雞泥  |                       | 雞肉  | Taiwan   | I1C1 | Sanger (-)* |                                       | Uncertain |                             |
|            |     |     |               |             |                       | 鮭魚  |          | I1C2 | Sanger (-)* |                                       |           |                             |
| 2021.09.17 | 103 | I2A | Gim Cat       | 化毛貓罐-鮪魚     | Tonno Tuna            | 鮪魚  | Thailand | I2A  | Sanger (-)* |                                       | Uncertain |                             |
|            | 104 | I2B | Eats          | 易特廚 吻仔魚精緻大餐 |                       | 鮪魚  | Thailand | I2B1 | Sanger (+)  | <i>Katsuwonus pelamis</i>             | No        | Supplementary Information 2 |
|            |     |     |               |             |                       | 雞肉  |          | I2B2 | Sanger (+)  | <i>Gallus gallus</i>                  |           | Supplementary Information 2 |
|            |     |     |               |             |                       | 吻仔魚 |          | I2B3 | Sanger (+)  | <i>Encrasicholina punctifer</i>       |           | Supplementary Information 2 |
|            | 105 | I2C | Dr. Clauder's | 3 號鮪魚雞肉     | Tuna & chicken breast | 鮪魚  | Thailand | I2C1 | Sanger (-)* |                                       | No        |                             |
|            |     |     |               |             |                       | 雞肉  |          | I2C2 | Sanger (+)  | <i>Gallus gallus</i>                  |           | Supplementary Information 2 |

|            |     |     |               |                       |                                                                            |      |          |      |            |                                      |    |                             |
|------------|-----|-----|---------------|-----------------------|----------------------------------------------------------------------------|------|----------|------|------------|--------------------------------------|----|-----------------------------|
|            | 106 | I2D | Dr. Clauder's | 4 號鮪魚鮭魚               | Tuna & salmon                                                              | 鮪魚   | Thailand | I2D1 | Sanger (+) | <i>Katsuwonus pelamis</i>            | No | Supplementary Information 2 |
|            |     |     |               |                       |                                                                            |      |          |      |            | <i>Thunnus albacares<sup>a</sup></i> |    |                             |
|            |     |     |               |                       |                                                                            | 鮭魚   |          | I2D2 | Sanger (+) | <i>Oncorhynchus gorbuscha</i>        |    | Supplementary Information 2 |
| 2021.11.12 | 107 | J1A | Cherie 法麗     | 室內貓書毛配方 微湯<br>汁鮪魚佐鮭魚  | Tuna topping salmon in gravy                                               | 鮪魚   | Thailand | J1A1 | Sanger (+) | <i>Katsuwonus pelamis</i>            | No | Supplementary Information 2 |
|            |     |     |               |                       |                                                                            |      |          |      |            | <i>Thunnus albacares<sup>a</sup></i> |    |                             |
|            |     |     |               |                       |                                                                            | 鮭魚   | Thailand | J1A2 | Sanger (+) | <i>Oncorhynchus gorbuscha</i>        |    | Supplementary Information 2 |
|            | 108 | J1B | Cherie 法麗     | 微湯汁系列 天然黃鱈<br>鮪佐正鰹・鮭魚 | Flaked yellowfin mix, skipjack<br>tuna with wild salmon entrée in<br>Gravy | 黃鱈鮪魚 | Thailand | J1B1 | Sanger (+) | <i>Katsuwonus pelamis</i>            | No | Supplementary Information 2 |
|            |     |     |               |                       |                                                                            |      |          |      |            | <i>Thunnus albacares<sup>a</sup></i> |    |                             |
|            |     |     |               |                       |                                                                            | 鰹魚   | Thailand | J1B2 | Sanger (+) | <i>Oncorhynchus gorbuscha</i>        |    | Supplementary Information 2 |
|            |     |     |               |                       |                                                                            | 鮭魚   | Thailand | J1B3 | Sanger (+) | <i>Oncorhynchus gorbuscha</i>        |    | Supplementary Information 2 |
|            | 109 | J1C | Cherie 法麗     | 微湯汁系列 天然黃鱈<br>鮪佐正鰹    | Flaked yellowfin mix skipjack<br>tuna entrée in gravy                      | 黃鱈鮪魚 | Thailand | J1C1 | Sanger (+) | <i>Katsuwonus pelamis</i>            | No | Supplementary Information 2 |

|            |     |               |               |               |          |       |            |                                       |                                       |                             |                             |
|------------|-----|---------------|---------------|---------------|----------|-------|------------|---------------------------------------|---------------------------------------|-----------------------------|-----------------------------|
|            |     |               |               |               |          |       |            |                                       | <i>Thunnus albacares</i> <sup>a</sup> |                             |                             |
|            |     |               |               | 鯷魚            | Thailand | J1C2  | Sanger (+) | <i>Thunnus tonggol</i>                |                                       | Supplementary Information 2 |                             |
|            |     |               |               |               |          |       |            | <i>Thunnus atlanticus</i>             |                                       |                             |                             |
|            |     |               |               |               |          |       |            | <i>Thunnus alalunga</i>               |                                       |                             |                             |
|            |     |               |               |               |          |       |            | <i>Thunnus albacares</i>              |                                       |                             |                             |
|            |     |               |               |               |          |       |            | <i>Thunnus maccoyii</i>               |                                       |                             |                             |
| 110        | J1D | Natural kitty | 無膠肉湯罐-鮪魚佐鯷魚魚湯 | 鮪魚            | Thailand | J1D1  | Sanger (+) | <i>Katsuwonus pelamis</i>             | No                                    | Supplementary Information 2 |                             |
|            |     |               |               |               |          |       |            | <i>Thunnus albacares</i> <sup>a</sup> |                                       |                             |                             |
|            |     |               |               | 鯷魚            | Thailand | J1D2  | Sanger (+) | <i>Encrasicholina punctifer</i>       |                                       | Supplementary Information 2 |                             |
| 2021.11.17 | 111 | J2A           | CIAO          | 幼貓罐鮪魚+鯷魚 1歲以下 | 鮪魚       | Japan | J2A1       | Sanger (+)                            | <i>Thunnus tonggol</i>                | No                          | Supplementary Information 2 |
|            |     |               |               |               |          |       |            | <i>Thunnus atlanticus</i>             |                                       |                             |                             |
|            |     |               |               |               |          |       |            | <i>Thunnus alalunga</i>               |                                       |                             |                             |
|            |     |               |               |               |          |       |            | <i>Thunnus albacares</i>              |                                       |                             |                             |
|            |     |               |               |               |          |       |            | <i>Thunnus maccoyii</i>               |                                       |                             |                             |
|            |     |               |               | 吻仔魚           |          | J2A2  | Sanger (+) | <i>Engraulis japonicus</i>            |                                       | Supplementary Information 2 |                             |

|     |     |          |                       |                  |     |          |      |             |                                 |    |                                      |
|-----|-----|----------|-----------------------|------------------|-----|----------|------|-------------|---------------------------------|----|--------------------------------------|
| 112 | J2B | PLAN CAT | 喵洽普貓罐-鯖魚&吻仔魚          | Tuna & whitebait | 鯖魚  | Thailand | J2B1 | Sanger (+)  | <i>Katsuwonus pelamis</i>       | No | Supplementary Information 2          |
|     |     |          |                       |                  |     |          |      |             |                                 |    | <i>Thunnus albacares<sup>a</sup></i> |
|     |     |          |                       |                  | 吻仔魚 |          | J2B2 | Sanger (+)  | <i>Encrasicholina punctifer</i> |    | Supplementary Information 2          |
| 113 | J2C | Eats 吃   | 易特廚 奢華嫩鮭魚大餐(鯖魚+雞肉+鮭魚) |                  | 鯖魚  | Thailand | J2C1 | Sanger (-)* |                                 | No |                                      |
|     |     |          |                       |                  | 雞肉  |          | J2C2 | Sanger (+)  | <i>Gallus gallus</i>            |    | Supplementary Information 2          |
|     |     |          |                       |                  | 鮭魚  |          |      |             |                                 |    |                                      |
| 114 | I3B | 快樂尾      | 貓肯罐 雙魚複合保養            |                  | 鯖魚  | Taiwan   | I3B1 | Sanger (-)* |                                 | No |                                      |
|     |     |          |                       |                  | 旗魚  |          | I3B2 | Sanger (+)  | <i>Istiophorus albicans</i>     |    | Supplementary Information 2          |
|     |     |          |                       |                  |     |          |      |             | <i>Istiophorus platypterus</i>  |    |                                      |
|     |     |          |                       |                  |     |          |      |             | <i>Istiompax indica</i>         |    |                                      |
|     |     |          |                       |                  |     |          |      |             | <i>Makaira nigricans</i>        |    |                                      |
|     |     |          |                       |                  |     |          |      |             | <i>Makaira mazara</i>           |    |                                      |
| 115 | I3C | 銀湯匙      | 貓罐頭雞肉+吻仔魚             |                  | 鰹魚  | Thailand | I3C1 | Sanger (+)  | <i>Gallus gallus</i>            | No | Supplementary Information 2          |
|     |     |          |                       |                  | 鯖魚  |          | I3C2 | Sanger (-)* |                                 |    |                                      |



|            |     |     |         |                         |                                    |     |          |      |                                      |     |                             |
|------------|-----|-----|---------|-------------------------|------------------------------------|-----|----------|------|--------------------------------------|-----|-----------------------------|
|            |     |     |         |                         |                                    | 吻仔魚 |          | I3C3 | Sanger (-)*                          |     |                             |
|            |     |     |         |                         |                                    | 雞肉  |          | I3C4 | Sanger (+) <i>Gallus gallus</i>      |     | Supplementary Information 2 |
|            | 116 | I3D | 銀湯匙     | 貓罐頭鮪魚+鯷魚+吻仔魚            |                                    | 鮪魚  | Thailand | I3D1 | Sanger (+) <i>Katsuwonus pelamis</i> | No  | Supplementary Information 2 |
|            |     |     |         |                         |                                    |     |          |      | <i>Thunnus albacares*</i>            |     |                             |
|            |     |     |         |                         |                                    | 鯷魚  |          | I3D2 | Sanger (+) <i>Katsuwonus pelamis</i> |     | Supplementary Information 2 |
|            |     |     |         |                         |                                    |     |          |      | <i>Thunnus albacares*</i>            |     |                             |
| 2021.12.14 | 117 | L1A | Applaws | 愛普士全天然主食罐 (鮪魚-幼貓配方)     | Kitten-tuna in jelly               | 鮪魚  | Thailand | L1A  | Sanger (+) <i>Auxis thazard</i>      | Yes | Supplementary Information 2 |
|            |     |     |         |                         |                                    |     |          |      | <i>Auxis rochei</i>                  |     |                             |
|            |     |     |         |                         |                                    |     |          |      | <i>Euthynnus affinis<sup>d</sup></i> |     |                             |
|            | 118 | B2C | SEEDS   | Dr. Wish 愛貓調整配方 營養食(泥狀) | Tuna + chicken + vitamin B complex | 鮪魚  | Thailand | B2C  | NGS (+) <i>Thunnus alalunga</i>      | Yes | GenBank: PRJNA1036020       |
|            |     |     |         |                         |                                    | 雞肉  |          |      | <i>Thunnus atlanticus</i>            |     |                             |
|            |     |     |         |                         |                                    |     |          |      | <i>Thunnus obesus</i>                |     |                             |
|            |     |     |         |                         |                                    |     |          |      | <i>Katsuwonus pelamis</i>            |     |                             |
|            |     |     |         |                         |                                    |     |          |      | <i>Auxis rochei</i>                  |     |                             |
|            |     |     |         |                         |                                    |     |          |      | <i>Auxis thazard</i>                 |     |                             |

*Euthymnus affinis*

*Sarda orientalis*

*Micromesistius* sp.

*Gallus gallus*

*Bos taurus*

*Cervus elaphus*

*Ovis aries*

*Felis catus*

*Homo sapiens*

*Trachypenaecus curvirostris*

*Plicofollis nella*

*Acinetobacter junii*

119

I3A

快樂尾

貓肯罐 戶心雞鮪鮮泥

鮪魚

Taiwan

I3A

NGS (+)

*Thunnus alalunga*

Yes

GenBank:  
PRJNA1036020

雞肉

*Thunnus atlanticus*

*Thunnus obesus*

*Katsuwonus pelamis*

*Auxis thazard*

*Scomber colias*

*Cololabis saira*

*Oncorhynchus gorbuscha*

*Salmo* environmental sample

|            |     |     |          |           |                         |     |        |     |         |                                   |     |                          |
|------------|-----|-----|----------|-----------|-------------------------|-----|--------|-----|---------|-----------------------------------|-----|--------------------------|
|            |     |     |          |           |                         |     |        |     |         | <i>Sardinella fijiensis</i>       |     |                          |
|            |     |     |          |           |                         |     |        |     |         | <i>Chanos chanos</i>              |     |                          |
|            |     |     |          |           |                         |     |        |     |         | <i>Gallus gallus</i>              |     |                          |
|            |     |     |          |           |                         |     |        |     |         | <i>Meleagris gallopavo</i>        |     |                          |
|            |     |     |          |           |                         |     |        |     |         | <i>Homo sapiens</i>               |     |                          |
| 2021.06.07 | 120 | F2A | GAT-POOL | 雞肉鮪魚干貝主食罐 | Chicken, tuna & scallop | 雞肉  | Taiwan | F2A | NGS (+) | <i>Gallus gallus</i>              | Yes | GenBank:<br>PRJNA1036020 |
|            |     |     |          |           |                         | 鮪魚  |        |     |         | <i>Thunnus alalunga</i>           |     |                          |
|            |     |     |          |           |                         | 干貝  |        |     |         | <i>Thunnus atlanticus</i>         |     |                          |
|            |     |     |          |           |                         | 鰲蛋粉 |        |     |         | <i>Thunnus obesus</i>             |     |                          |
|            |     |     |          |           |                         |     |        |     |         | <i>Katsuwonus pelamis</i>         |     |                          |
|            |     |     |          |           |                         |     |        |     |         | <i>Allothunnus fallai</i>         |     |                          |
|            |     |     |          |           |                         |     |        |     |         | <i>Auxis rochei</i>               |     |                          |
|            |     |     |          |           |                         |     |        |     |         | <i>Auxis thazard</i>              |     |                          |
|            |     |     |          |           |                         |     |        |     |         | <i>Euthynnus affinis</i>          |     |                          |
|            |     |     |          |           |                         |     |        |     |         | <i>Sarda orientalis</i>           |     |                          |
|            |     |     |          |           |                         |     |        |     |         | <i>Pelodiscus sinensis</i>        |     |                          |
|            |     |     |          |           |                         |     |        |     |         | <i>Isurus oxyrinchus</i>          |     |                          |
|            |     |     |          |           |                         |     |        |     |         | <i>Homo sapiens</i>               |     |                          |
|            |     |     |          |           |                         |     |        |     |         | <i>Bos taurus</i>                 |     |                          |
|            |     |     |          |           |                         |     |        |     |         | <i>Trachypenaeus curvirostris</i> |     |                          |

|            |     |         |               |                               |                           |                 |             |         |                                                                                                                                                                                                                                                                                                                                         |                                                                                                                                                                                                                  |                          |                          |
|------------|-----|---------|---------------|-------------------------------|---------------------------|-----------------|-------------|---------|-----------------------------------------------------------------------------------------------------------------------------------------------------------------------------------------------------------------------------------------------------------------------------------------------------------------------------------------|------------------------------------------------------------------------------------------------------------------------------------------------------------------------------------------------------------------|--------------------------|--------------------------|
| 121        | F2B | PURRFAC | 波菲特貓用主食罐(無加膠) | Chicken, fish & chicken broth | 雞肉<br>鯷魚<br>魚油            | Taiwan          | F2B         | NGS (+) | <i>Gallus gallus</i><br><i>Coturnix japonica</i><br><i>Katsuwonus pelamis</i><br><i>Auxis thazard</i><br><i>Auxis rochei</i><br><i>Euthynnus affinis</i><br><i>Thunnus obesus</i><br><i>Thunnus atlanticus</i><br><i>Thunnus alalunga</i><br><i>Istiophorus platypterus</i><br><i>Homo sapiens</i><br><i>Trachypenaeus curvirostris</i> | Yes                                                                                                                                                                                                              | GenBank:<br>PRJNA1036020 |                          |
| 2021.06.10 | 122 | F2C     | ZIWI          | 鱈魚羊肉主食罐                       | NZ Mackerel & lamb recipe | 鱈魚<br>羊肉<br>綠唇貝 | New Zealand | F2C     | NGS (+)                                                                                                                                                                                                                                                                                                                                 | <i>Thunnus obesus</i><br><i>Thunnus atlanticus</i><br><i>Thunnus alalunga</i><br><i>Katsuwonus pelamis</i><br><i>Sarda orientalis</i><br><i>Auxis thazard</i><br><i>Auxis rochei</i><br><i>Euthynnus affinis</i> | Yes                      | GenBank:<br>PRJNA1036020 |

|     |     |      |                    |    |        |     |         |                                                                                                                                                                                                                   |     |                          |
|-----|-----|------|--------------------|----|--------|-----|---------|-------------------------------------------------------------------------------------------------------------------------------------------------------------------------------------------------------------------|-----|--------------------------|
| 123 | F2D | 超越汪喵 | 雞肉+鯉魚+蝦仁大餐<br>(貓用) | 雞肉 | Taiwan | F2D | NGS (+) | <i>Gallus gallus</i><br><i>Anas platyrhynchos</i><br><i>Katsuwonus pelamis</i><br><i>Auxis thazard</i><br><i>Auxis rochei</i><br><i>Euthynnus affinis</i><br><i>Sarda orientalis</i><br><i>Allothunnus fallai</i> | Yes | GenBank:<br>PRJNA1036020 |
|     |     |      |                    | 鯉魚 |        |     |         | <i>Scomber colias</i>                                                                                                                                                                                             |     |                          |
|     |     |      |                    | 蝦仁 |        |     |         | <i>Scomber australasicus</i>                                                                                                                                                                                      |     |                          |
|     |     |      |                    | 魚油 |        |     |         | <i>Capra hircus</i>                                                                                                                                                                                               |     |                          |
|     |     |      |                    |    |        |     |         | <i>Ovis canadensis</i>                                                                                                                                                                                            |     |                          |
|     |     |      |                    |    |        |     |         | <i>Ovis aries</i>                                                                                                                                                                                                 |     |                          |
|     |     |      |                    |    |        |     |         | <i>Ovis orientalis</i>                                                                                                                                                                                            |     |                          |
|     |     |      |                    |    |        |     |         | <i>Ovis ammon</i>                                                                                                                                                                                                 |     |                          |
|     |     |      |                    |    |        |     |         | <i>Cervus elaphus</i>                                                                                                                                                                                             |     |                          |
|     |     |      |                    |    |        |     |         | <i>Cervus hanglu</i>                                                                                                                                                                                              |     |                          |
|     |     |      |                    |    |        |     |         | <i>Bos taurus</i>                                                                                                                                                                                                 |     |                          |
|     |     |      |                    |    |        |     |         | <i>Homo sapiens</i>                                                                                                                                                                                               |     |                          |
|     |     |      |                    |    |        |     |         | <i>Trachypenaeus curvirostris</i>                                                                                                                                                                                 |     |                          |
|     |     |      |                    |    |        |     |         | <i>Cutibacterium acnes</i>                                                                                                                                                                                        |     |                          |

|     |     |                 |                    |                          |     |        |     |         |                                   |     |                          |
|-----|-----|-----------------|--------------------|--------------------------|-----|--------|-----|---------|-----------------------------------|-----|--------------------------|
|     |     |                 |                    |                          |     |        |     |         | <i>Thunnus obesus</i>             |     |                          |
|     |     |                 |                    |                          |     |        |     |         | <i>Thunnus alalunga</i>           |     |                          |
|     |     |                 |                    |                          |     |        |     |         | <i>Thunnus atlanticus</i>         |     |                          |
|     |     |                 |                    |                          |     |        |     |         | <i>Cervus elaphus</i>             |     |                          |
|     |     |                 |                    |                          |     |        |     |         | <i>Homo sapiens</i>               |     |                          |
|     |     |                 |                    |                          |     |        |     |         | <i>Trachypenaeus curvirostris</i> |     |                          |
| 124 | F2E | 汪喵星球            | 貓咪雞肉鰹魚蝦仁餐          | Chicken, bonito & shrimp | 雞肉  | Taiwan | F2E | NGS (+) | <i>Gallus gallus</i>              | Yes | GenBank:<br>PRJNA1036020 |
|     |     |                 |                    |                          | 鰹魚  |        |     |         | <i>Katsuwonus pelamis</i>         |     |                          |
|     |     |                 |                    |                          | 黃金蜆 |        |     |         | <i>Auxis thazard</i>              |     |                          |
|     |     |                 |                    |                          | 蝦仁  |        |     |         | <i>Auxis rochei</i>               |     |                          |
|     |     |                 |                    |                          | 魚油  |        |     |         | <i>Euthymnus affinis</i>          |     |                          |
|     |     |                 |                    |                          |     |        |     |         | <i>Thunnus atlanticus</i>         |     |                          |
|     |     |                 |                    |                          |     |        |     |         | <i>Thunnus obesus</i>             |     |                          |
|     |     |                 |                    |                          |     |        |     |         | <i>Thunnus alalunga</i>           |     |                          |
|     |     |                 |                    |                          |     |        |     |         | <i>Sarda orientalis</i>           |     |                          |
|     |     |                 |                    |                          |     |        |     |         | <i>Sus scrofa</i>                 |     |                          |
|     |     |                 |                    |                          |     |        |     |         | <i>Homo sapiens</i>               |     |                          |
|     |     |                 |                    |                          |     |        |     |         | <i>Acinetobacter junii</i>        |     |                          |
| 125 | F2F | M'DARYN 肉食<br>控 | 喵樂肉食控主食罐(嫩<br>雞鮭魚) |                          | 雞肉  | Taiwan | F2F | NGS (+) | <i>Gallus gallus</i>              | Yes | GenBank:<br>PRJNA1036020 |



|     |     |           |                               |     |             |     |         |                                 |                                   |                          |  |
|-----|-----|-----------|-------------------------------|-----|-------------|-----|---------|---------------------------------|-----------------------------------|--------------------------|--|
|     |     |           |                               |     |             |     |         |                                 | <i>Sus scrofa</i>                 |                          |  |
|     |     |           |                               |     |             |     |         |                                 | <i>Ovis aries</i>                 |                          |  |
|     |     |           |                               |     |             |     |         |                                 | <i>Homo sapiens</i>               |                          |  |
|     |     |           |                               |     |             |     |         |                                 | <i>Trachypenaeus curvirostris</i> |                          |  |
| 127 | F3C | ZIWI Peak | ziwi peak 巔峰鮮肉貓<br>罐頭-奧塔哥山谷牛鹿 | 牛肉  | New Zealand | F3C | NGS (+) | <i>Bos gaurus</i>               | Yes                               | GenBank:<br>PRJNA1036020 |  |
|     |     |           |                               | 鹿肉  |             |     |         | <i>Bos taurus</i>               |                                   |                          |  |
|     |     |           |                               | 蘭鱈魚 |             |     |         | <i>Cervus elaphus</i>           |                                   |                          |  |
|     |     |           |                               | 鱈魚  |             |     |         | <i>Capra hircus</i>             |                                   |                          |  |
|     |     |           |                               | 羊肚  |             |     |         | <i>Cervus canadensis</i>        |                                   |                          |  |
|     |     |           |                               | 綠唇貝 |             |     |         | <i>Cervus nippon</i>            |                                   |                          |  |
|     |     |           |                               |     |             |     |         | <i>Ovis canadensis</i>          |                                   |                          |  |
|     |     |           |                               |     |             |     |         | <i>Ovis orientalis</i>          |                                   |                          |  |
|     |     |           |                               |     |             |     |         | <i>Ovis ammon</i>               |                                   |                          |  |
|     |     |           |                               |     |             |     |         | <i>Ovis aries</i>               |                                   |                          |  |
|     |     |           |                               |     |             |     |         | <i>Micromesistius poutassou</i> |                                   |                          |  |
|     |     |           |                               |     |             |     |         | <i>Micromesistius</i> sp.       |                                   |                          |  |
|     |     |           |                               |     |             |     |         | <i>Macruronus magellanicus</i>  |                                   |                          |  |
|     |     |           |                               |     |             |     |         | <i>Thunnus atlanticus</i>       |                                   |                          |  |
|     |     |           |                               |     |             |     |         | <i>Thunnus obesus</i>           |                                   |                          |  |
|     |     |           |                               |     |             |     |         | <i>Thunnus alalunga</i>         |                                   |                          |  |
|     |     |           |                               |     |             |     |         | <i>Katsuwonus pelamis</i>       |                                   |                          |  |



|     |     |      |           |    |        |     |         |                            |                                   |                          |  |
|-----|-----|------|-----------|----|--------|-----|---------|----------------------------|-----------------------------------|--------------------------|--|
|     |     |      |           |    |        |     |         |                            | <i>Auxis thazard</i>              |                          |  |
|     |     |      |           |    |        |     |         |                            | <i>Auxis rochei</i>               |                          |  |
|     |     |      |           |    |        |     |         |                            | <i>Euthymus affinis</i>           |                          |  |
|     |     |      |           |    |        |     |         |                            | <i>Sarda orientalis</i>           |                          |  |
|     |     |      |           |    |        |     |         |                            | <i>Arripis truttaceus</i>         |                          |  |
|     |     |      |           |    |        |     |         |                            | <i>Gallus gallus</i>              |                          |  |
|     |     |      |           |    |        |     |         |                            | <i>Trachypenaeus curvirostris</i> |                          |  |
|     |     |      |           |    |        |     |         |                            | <i>Phascolosoma esculenta</i>     |                          |  |
| 128 | F3D | 超越汪喵 | 深海鱈魚餐(貓用) | 鱈魚 | Taiwan | F3D | NGS (+) | <i>Atheresthes stomias</i> | Yes                               | GenBank:<br>PRJNA1036020 |  |
|     |     |      |           | 雞肉 |        |     |         | <i>Thunnus alalunga</i>    |                                   |                          |  |
|     |     |      |           | 魚油 |        |     |         | <i>Thunnus obesus</i>      |                                   |                          |  |
|     |     |      |           |    |        |     |         | <i>Thunnus atlanticus</i>  |                                   |                          |  |
|     |     |      |           |    |        |     |         | <i>Katsuwonus pelamis</i>  |                                   |                          |  |
|     |     |      |           |    |        |     |         | <i>Auxis thazard</i>       |                                   |                          |  |
|     |     |      |           |    |        |     |         | <i>Auxis rochei</i>        |                                   |                          |  |
|     |     |      |           |    |        |     |         | <i>Euthymus affinis</i>    |                                   |                          |  |
|     |     |      |           |    |        |     |         | <i>Sarda orientalis</i>    |                                   |                          |  |
|     |     |      |           |    |        |     |         | <i>Gallus gallus</i>       |                                   |                          |  |
|     |     |      |           |    |        |     |         | <i>Coturnix japonica</i>   |                                   |                          |  |
|     |     |      |           |    |        |     |         | <i>Bos taurus</i>          |                                   |                          |  |
|     |     |      |           |    |        |     |         | <i>Ovis aries</i>          |                                   |                          |  |

|     |     |    |                       |              |          |     |         |                                     |     |                          |
|-----|-----|----|-----------------------|--------------|----------|-----|---------|-------------------------------------|-----|--------------------------|
|     |     |    |                       |              |          |     |         | <i>Cervus elaphus</i>               |     |                          |
|     |     |    |                       |              |          |     |         | <i>Homo sapiens</i>                 |     |                          |
|     |     |    |                       |              |          |     |         | <i>Propionibacterium acnes</i>      |     |                          |
| 129 | L1B | 漁極 | 漁極 AM32 慕絲貓罐<br>(鮪+鮭) | 鮪魚<br><br>鮭魚 | Thailand | L1B | NGS (+) | <i>Thunnus alalunga</i>             | Yes | GenBank:<br>PRJNA1036020 |
|     |     |    |                       |              |          |     |         | <i>Thunnus atlanticus</i>           |     |                          |
|     |     |    |                       |              |          |     |         | <i>Thunnus obesus</i>               |     |                          |
|     |     |    |                       |              |          |     |         | <i>Katsuwonus pelamis</i>           |     |                          |
|     |     |    |                       |              |          |     |         | <i>Allothunnus fallai</i>           |     |                          |
|     |     |    |                       |              |          |     |         | <i>Auxis rochei</i>                 |     |                          |
|     |     |    |                       |              |          |     |         | <i>Auxis thazard</i>                |     |                          |
|     |     |    |                       |              |          |     |         | <i>Euthynnus affinis</i>            |     |                          |
|     |     |    |                       |              |          |     |         | <i>Oncorhynchus gorbuscha</i>       |     |                          |
|     |     |    |                       |              |          |     |         | <i>Salmo environmental sample</i>   |     |                          |
|     |     |    |                       |              |          |     |         | <i>Chanos chanos</i>                |     |                          |
|     |     |    |                       |              |          |     |         | <i>Cololabis saira</i>              |     |                          |
|     |     |    |                       |              |          |     |         | <i>Reinhardtius hippoglossoides</i> |     |                          |
|     |     |    |                       |              |          |     |         | <i>Scomber colias</i>               |     |                          |
|     |     |    |                       |              |          |     |         | <i>Gallus gallus</i>                |     |                          |
|     |     |    |                       |              |          |     |         | <i>Meleagris gallopavo</i>          |     |                          |
|     |     |    |                       |              |          |     |         | <i>Meleagris ocellata</i>           |     |                          |
|     |     |    |                       |              |          |     |         | <i>Bos taurus</i>                   |     |                          |

|     |     |       |                   |          |          |     |         |                                                                                                                                                                                                                                                                                                                                                                                                                                                                                                                                                  |     |                          |
|-----|-----|-------|-------------------|----------|----------|-----|---------|--------------------------------------------------------------------------------------------------------------------------------------------------------------------------------------------------------------------------------------------------------------------------------------------------------------------------------------------------------------------------------------------------------------------------------------------------------------------------------------------------------------------------------------------------|-----|--------------------------|
| 130 | LIC | AIXIA | 健康罐幼貓 6 號-雞、<br>鮪 | 雞肉<br>鮪魚 | Thailand | LIC | NGS (+) | <i>Thunnus alalunga</i><br><i>Thunnus albacares</i><br><i>Thunnus atlanticus</i><br><i>Thunnus obesus</i><br><i>Katsuwonus pelamis</i><br><i>Allothunnus fallai</i><br><i>Auxis rochei</i><br><i>Auxis thazard</i><br><i>Euthynnus affinis</i><br><i>Scomber colias</i><br><i>Salmo</i> environmental sample<br><i>Oncorhynchus gorbuscha</i><br><i>Chanos chanos</i><br><i>Cololabis saira</i><br><i>Reinhardtius hippoglossoides</i><br><i>Gallus gallus</i><br><i>Meleagris gallopavo</i><br><i>Meleagris ocellata</i><br><i>Homo sapiens</i> | Yes | GenBank:<br>PRJNA1036020 |
|-----|-----|-------|-------------------|----------|----------|-----|---------|--------------------------------------------------------------------------------------------------------------------------------------------------------------------------------------------------------------------------------------------------------------------------------------------------------------------------------------------------------------------------------------------------------------------------------------------------------------------------------------------------------------------------------------------------|-----|--------------------------|

|            |     |          |                         |                                       |          |          |     |         |                                                                                                                                                                                                                                                                                                                                                                                                                                                                                                                           |     |                          |
|------------|-----|----------|-------------------------|---------------------------------------|----------|----------|-----|---------|---------------------------------------------------------------------------------------------------------------------------------------------------------------------------------------------------------------------------------------------------------------------------------------------------------------------------------------------------------------------------------------------------------------------------------------------------------------------------------------------------------------------------|-----|--------------------------|
| 131        | L1D | WELLNESS | SS 名廚特選主食罐(貓用)鮮鮪魚泥+鮮鮭魚泥 | Skipjack tuna & wild salmon<br>Entrée | 鮪魚<br>鮭魚 | Thailand | L1D | NGS (+) | <i>Thunnus alalunga</i><br><br><i>Thunnus atlanticus</i><br><br><i>Thunnus obesus</i><br><br><i>Katsuwonus pelamis</i><br><br><i>Auxis thazard</i><br><br><i>Euthynnus affinis</i><br><br><i>Scomber colias</i><br><br><i>Oncorhynchus gorbuscha</i><br><br><i>Salmo environmental sample</i><br><br><i>Chanos chanos</i><br><br><i>Cololabis saira</i><br><br><i>Encrasicholina punctifer</i><br><br><i>Gallus gallus</i><br><br><i>Meleagris gallopavo</i><br><br><i>Homo sapiens</i><br><br><i>Acinetobacter junii</i> | Yes | GenBank:<br>PRJNA1036020 |
| 2021.12.21 | 132 | L2A      | HeroMama 貓咪朔源鮮肉主食罐(虱目魚) |                                       | 虱目魚      | Taiwan   | L2A | NGS (+) | <i>Chanos chanos</i><br><br><i>Thunnus alalunga</i><br><br><i>Thunnus atlanticus</i><br><br><i>Thunnus obesus</i>                                                                                                                                                                                                                                                                                                                                                                                                         | Yes | GenBank:<br>PRJNA1036020 |

|     |     |     |                                        |                                       |          |        |     |         |                                                                                                                                                                                                                                                                                                      |     |                          |
|-----|-----|-----|----------------------------------------|---------------------------------------|----------|--------|-----|---------|------------------------------------------------------------------------------------------------------------------------------------------------------------------------------------------------------------------------------------------------------------------------------------------------------|-----|--------------------------|
| 133 | L2B | 小怪獸 | Litomon 怪獸部落 2 種<br>肉無膠主食罐-貓用鯖<br>魚雞肉餐 | Mackerel & chicken recipe for<br>cats | 鯖魚<br>雞肉 | Taiwan | L2B | NGS (+) | <i>Katsuwonus pelamis</i><br><i>Auxis thazard</i><br><i>Scomber colias</i><br><i>Cololabis saira</i><br><i>Salmo</i> environmental sample<br><i>Reinhardtius hippoglossoides</i><br><i>Oncorhynchus gorbuscha</i><br><i>Gallus gallus</i><br><i>Meleagris gallopavo</i><br><i>Meleagris ocellata</i> | Yes | GenBank:<br>PRJNA1036020 |
|     |     |     |                                        |                                       |          |        |     |         | <i>Thunnus alalunga</i><br><i>Thunnus atlanticus</i><br><i>Thunnus obesus</i><br><i>Katsuwonus pelamis</i><br><i>Auxis thazard</i><br><i>Scomber colias</i><br><i>Chanos chanos</i><br><i>Cololabis saira</i><br><i>Lates calcarifer</i><br><i>Oncorhynchus gorbuscha</i>                            |     |                          |

|     |     |      |                       |                     |        |     |         |                                     |                                   |                          |  |
|-----|-----|------|-----------------------|---------------------|--------|-----|---------|-------------------------------------|-----------------------------------|--------------------------|--|
|     |     |      |                       |                     |        |     |         |                                     | <i>Salmo</i> environmental sample |                          |  |
|     |     |      |                       |                     |        |     |         |                                     | <i>Gallus gallus</i>              |                          |  |
|     |     |      |                       |                     |        |     |         |                                     | <i>Meleagris gallopavo</i>        |                          |  |
|     |     |      |                       |                     |        |     |         |                                     | <i>Cervus elaphus</i>             |                          |  |
| 134 | L2C | 怪獸部落 | 怪獸部落實實無膠主食<br>罐-幼貓比目魚 | 雞肉                  | Taiwan | L2C | NGS (+) | <i>Gallus gallus</i>                | Yes                               | GenBank:<br>PRJNA1036020 |  |
|     |     |      |                       | 鯉魚                  |        |     |         | <i>Meleagris gallopavo</i>          |                                   |                          |  |
|     |     |      |                       | 比目魚                 |        |     |         | <i>Katsuwonus pelamis</i>           |                                   |                          |  |
|     |     |      |                       |                     |        |     |         | <i>Auxis thazard</i>                |                                   |                          |  |
|     |     |      |                       |                     |        |     |         | <i>Thunnus alalunga</i>             |                                   |                          |  |
|     |     |      |                       |                     |        |     |         | <i>Thunnus atlanticus</i>           |                                   |                          |  |
|     |     |      |                       |                     |        |     |         | <i>Thunnus obesus</i>               |                                   |                          |  |
|     |     |      |                       |                     |        |     |         | <i>Reinhardtius hippoglossoides</i> |                                   |                          |  |
|     |     |      |                       |                     |        |     |         | <i>Scomber colias</i>               |                                   |                          |  |
|     |     |      |                       |                     |        |     |         | <i>Oncorhynchus gorbuscha</i>       |                                   |                          |  |
|     |     |      |                       |                     |        |     |         | <i>Salmo</i> environmental sample   |                                   |                          |  |
|     |     |      |                       |                     |        |     |         | <i>Chanos chanos</i>                |                                   |                          |  |
|     |     |      |                       |                     |        |     |         | <i>Cololabis saira</i>              |                                   |                          |  |
| 135 | L2D | 挑嘴罐  | 汪喵星球挑嘴貓主食罐            | Sauryfish & chicken | Taiwan | L2D | NGS (+) | <i>Katsuwonus pelamis</i>           | Yes                               | GenBank:<br>PRJNA1036020 |  |
|     |     |      |                       |                     |        |     |         | <i>Thunnus alalunga</i>             |                                   |                          |  |
|     |     |      |                       |                     |        |     |         |                                     |                                   |                          |  |

雞肉

*Thunnus atlanticus*

*Thunnus obesus*

*Allothunnus fallai*

*Auxis thazard*

*Euthymnus affinis*

*Scomber colias*

*Cololabis saira*

*Oncorhynchus gorbuscha*

*Reinhardtius hippoglossoides*

*Salmo* environmental sample

*Chanos chanos*

*Engraulis japonicus*

*Encrasicholina punctifer*

*Gallus gallus*

*Meleagris gallopavo*

*Meleagris ocellata*

*Sus scrofa*

*Bos taurus*

*Cervus elaphus*

*Homo sapiens*

2021.12.23

136

L3A

德國駿寶

營養幼貓罐-鮪魚

Tuna

鮪魚

Thailand

L3A

NGS (+)

*Thunnus alalunga*

Yes

GenBank:  
PRJNA1036020

*Thunnus atlanticus*

*Thunnus obesus*

*Katsuwonus pelamis*

*Auxis rochei*

*Auxis thazard*

*Scomber colias*

*Euthymnus affinis*

*Chanos chanos*

*Reinhardtius hippoglossoides*

*Cololabis saira*

*Oncorhynchus gorbuscha*

*Salmo* environmental sample

*Engraulis japonicus*

*Encrasicholina punctifer*

*Gallus gallus*

*Meleagris gallopavo*

*Meleagris ocellata*

*Felis catus*

*Homo sapiens*

137

L3B

林克博士

低敏主食貓罐

火雞肉

German

L3B

NGS (+)

*Meleagris gallopavo*

Yes

GenBank:  
PRJNA1036020

鮭魚

*Meleagris ocellata*



|     |     |     |              |    |        |     |         |                                                                                                                                                                                                                                                                                                                                                                                          |     |                          |
|-----|-----|-----|--------------|----|--------|-----|---------|------------------------------------------------------------------------------------------------------------------------------------------------------------------------------------------------------------------------------------------------------------------------------------------------------------------------------------------------------------------------------------------|-----|--------------------------|
| 138 | L3C | 羅西納 | 肉凍主食貓罐 鮭魚+鮮蝦 | 鮭魚 | German | L3C | NGS (+) | <i>Gallus gallus</i><br><i>Salmo</i> environmental sample<br><i>Oncorhynchus gorbuscha</i><br><i>Coregonus hoyi</i><br><i>Coregonus sardinella</i><br><i>Thunnus alalunga</i><br><i>Thunnus atlanticus</i><br><i>Thunnus obesus</i><br><i>Katsuwonus pelamis</i><br><i>Auxis thazard</i><br><i>Scomber colias</i><br><i>Chanos chanos</i><br><i>Cololabis saira</i><br><i>Bos taurus</i> | Yes | GenBank:<br>PRJNA1036020 |
|     |     |     |              | 鮮蝦 |        |     |         | <i>Thunnus alalunga</i><br><i>Thunnus atlanticus</i><br><i>Thunnus obesus</i><br><i>Katsuwonus pelamis</i><br><i>Auxis thazard</i><br><i>Scomber colias</i><br><i>Chanos chanos</i>                                                                                                                                                                                                      |     |                          |

*Cololabis saira*  
*Engraulis japonicus*  
*Salmo* environmental sample  
*Coregonus sardinella*  
*Oncorhynchus gorbuscha*  
*Coregonus hoyi*  
*Gallus gallus*  
*Meleagris gallopavo*  
*Meleagris ocellata*  
*Anas platyrhynchos*  
*Canis lupus*  
*Sus scrofa*  
*Bos taurus*  
*Homo sapiens*

---

2

3 †In brackets, “+” indicates successful Sanger sequencing, whereas “-“ indicates failure.

4 \*Sanger sequencing could not be conducted due to unsuccessful PCR.

5 <sup>a</sup>KM055376 is very likely to be *Katsuwonus pelamis* rather than *Thunnus albacares* (Chang, Kao, et al., 2021)

6 <sup>b</sup>LN558771 is very likely to be *Euthynnus affinis* rather than *E. lineatus*.

7 <sup>c</sup>MW595783 is very likely to be *E. affinis* rather than *Auxis thazard*.

- 8 <sup>d</sup>KM198909 is very likely to be *A. thazard* or *A. rochei* rather than *E. affinis*.
- 9 <sup>e</sup>NC\_053709 is very likely to be *Pholis fangi* rather than *Dictyosoma burgeri*.
- 10 <sup>f</sup>KM198901 is very likely to be *Lates calcarifer* rather than *Psammoperca waigiensis*.
